# Supplementary material for: Differences in fine-scale spatial genetic structure of European beech populations along elevational gradients
Source: Research Square preprint supplement (doi:10.21203/rs.3.rs-4559673/v1), 2024-07-18
Supplement: Supplementary file 1 [file 3ad6ca2ff1976ca8120e51f2.docx]

# **Supplementary material**

**Differences in fine-scale spatial genetic structure of European beech populations along elevational gradients**

Ourania Grigoriadou-Zormpa1,2, Selina Wilhelmi1,2, Boban Vucetic1, Mihnea Ioan Cezar Ciocîrlan3,4, Markus Mueller1,2, Elena Ciocîrlan3, Alexandru Lucian Curtu3, Mehdi Ben Targem5, Henning Wildhagen5, Oliver Gailing1,2,6, Katharina B. Budde1,7

1. Faculty for Forest Sciences and Forest Ecology, Forest Genetics and Forest Tree Breeding, University of Göttingen, Büsgenweg 2, 37077 Göttingen, Germany
2. Center for Integrated Breeding Research (CiBreed), University of Göttingen, Von-Siebold-Str. 4, 37075 Göttingen, Germany
3. Faculty of Silviculture and Forest Engineering, Transilvania University of Brasov, Sirul Beethoven 1, 500123 Brasov, Romania
4. National Institute for Research and Development in Forestry (INCDS) "Marin Drăcea", Brasov Station, Romania
5. HAWK University of Applied Sciences and Arts, Faculty of Resource Management, Büsgenweg 1a, 37077, Göttingen, Germany
6. Center of Biodiversity and sustainable Land Use (CBL), University of Göttingen, Büsgenweg 1, 37077 Göttingen, Germany
7. Northwest German Forest Research Institute, Forest Genetic Resources, Prof.-Oelkers-Straße 6, 34346, Hann. Münden, Germany

*: corresponding authors: katharina.budde@nw-fva.de; ogailin@gwd.de

Table S1: Details of the nuclear microsatellite markers (*EST-SSRs)

| Locus | Motive | Size (bp) | Forward primer (5`-3`) | Reverse primer (5`-3`) | Fluorescence label | Multiplex |
| --- | --- | --- | --- | --- | --- | --- |
| sfc0018 | (AG) 17 | 151-188 | GAAGCAGAGCATTGTATTGG | CATCTGTTTCAGTTCTGTAAAGG | HEX | I |
|  |  |  |  |  |  |  |
| sfc0161 | (AG) 22 | 104-148 | AAGCTCCACGATTCATTC | GCTGGAGTTGCTCTAAGTC | 6-FAM | I |
|  |  |  |  |  |  |  |
| sfc1063 | (CT) 13 | 187-211 | TTTCCAACTACAACTTCATTG | AGTGCTCGCATCGTATG | 6-FAM | I |
|  |  |  |  |  |  |  |
| sfc1143 | (AG) 21 | 102-136 | TGGCATCCTACTGTAATTTGAC | ATTCCACCCACCATCTGTC | HEX | I |
|  | (GCT) 5 |  |  |  |  |  |
| FS3-04 | (GTT) 3 | 191-206 | AGATGCACCACTTCAAATTC | TCTCCTCAGCAACATACCTC | HEX | II |
|  | (GCT) 6 |  |  |  |  |  |
| mfs11 | (AG) 10 | 130-150 | GGGGGTGGTTTCAAGTTTC | GAAGCCAATTATCACACCAAAAG | HEX | II |
|  |  |  |  |  |  |  |
| FgSI0006 * | (TGT) n | 259-264 | TTAACACCGCGGTAGAGACC | GCTCCAAGCTCTTGCTCACT | 6-FAM | III |
|  |  |  |  |  |  |  |
| FgSI0009 * | (ACC) n | 214-217 | TACCCATGCCCATATCCAGT | GGAAAGAAGAAGGGTGGAGG | HEX | III |
|  |  |  |  |  |  |  |
| FgSI0024 * | (TCG) n | 166-301 | GAATCGTCGGAATCGTTGTC | CGGTCGAGGATGATGACTTT | 6-FAM | III |
|  |  |  |  |  |  |  |
| FS_C1968 * | (TC) n | 299-301 | ATCGTTTCCACTTCCTCCGG | TTTCATGCACCCTCTCTAGG | 6-FAM | III |
|  |  |  |  |  |  |  |
| FS_C2361 * | (GAA) n | 196-205 | AGGTCCTTCAGTTTGGGAGC | ATTCCCATGCATCAAAATCC | 6-FAM | III |
|  |  |  |  |  |  |  |
| FS_C7377 * | (GAT) n | 139-166 | AATCGGACGGTCCATAGTGC | AGATCCGAGCTCAACTCACC | HEX | III |

Table S2: Details of the PCR protocol used for amplification of nuclear microsatellites in Romania Fagus sylvatica samples. Min, minutes; Sec, seconds.

|  | Run 1 | Time | Cycles |
| --- | --- | --- | --- |
| Taq polymerase activation | 95°C | 1 Min |  |
| Denaturation | 94°C | 1 Min | 10 |
| Annealing | 55°C | 30 Sec | 30 |
| Elongation | 72°C | 1 Min |  |
| Extension | 72°C | 20 Min |  |
| End | 16°C | ∞ |  |

Table S3: Pairwise FST and p-values (above diagonal) for the Romanian Fagus sylvatica populations for SSRs. Significant values are in bold

| FST/P-Value | Ruia | Lupului | Solomon | Tampa | Lempes |
| --- | --- | --- | --- | --- | --- |
| Ruia |  | **0.0019** | **0** | **0** | **0** |
| Lupului | **0.0044** |  | **0.0229** | 0.0918 | **0** |
| Solomon | **0.0079** | **0.0026** |  | 0.4547 | **0** |
| Tampa | **0.0066** | 0.0016 | 0 |  | **0** |
| Lempes | **0.0203** | **0.0169** | **0.011** | **0.0139** |  |

Table S4: Pairwise FST for the Romanian *Fagus sylvatica* populations for SNPs. The upper diagonal presents confidence interval values (lower - upper limit) for each pairwise FST comparison. All values are significant as the confidence intervals do not overlap with zero.

| FST/P-Value | Ruia | Lupului | Solomon | Tampa | Lempes |
| --- | --- | --- | --- | --- | --- |
| Ruia |  | 0.022-0.023 | 0.010-0.011 | 0.015-0.016 | 0.019-0.019 |
| Lupului | 0.023 |  | 0.018-0.018 | 0.008-0.008 | 0.018-0.018 |
| Solomon | 0.011 | 0.018 |  | 0.007-0.007 | 0.009-0.009 |
| Tampa | 0.016 | 0.009 | 0.007 |  | 0.013-0.013 |
| Lempes | 0.020 | 0.018 | 0.010 | 0.013 |  |


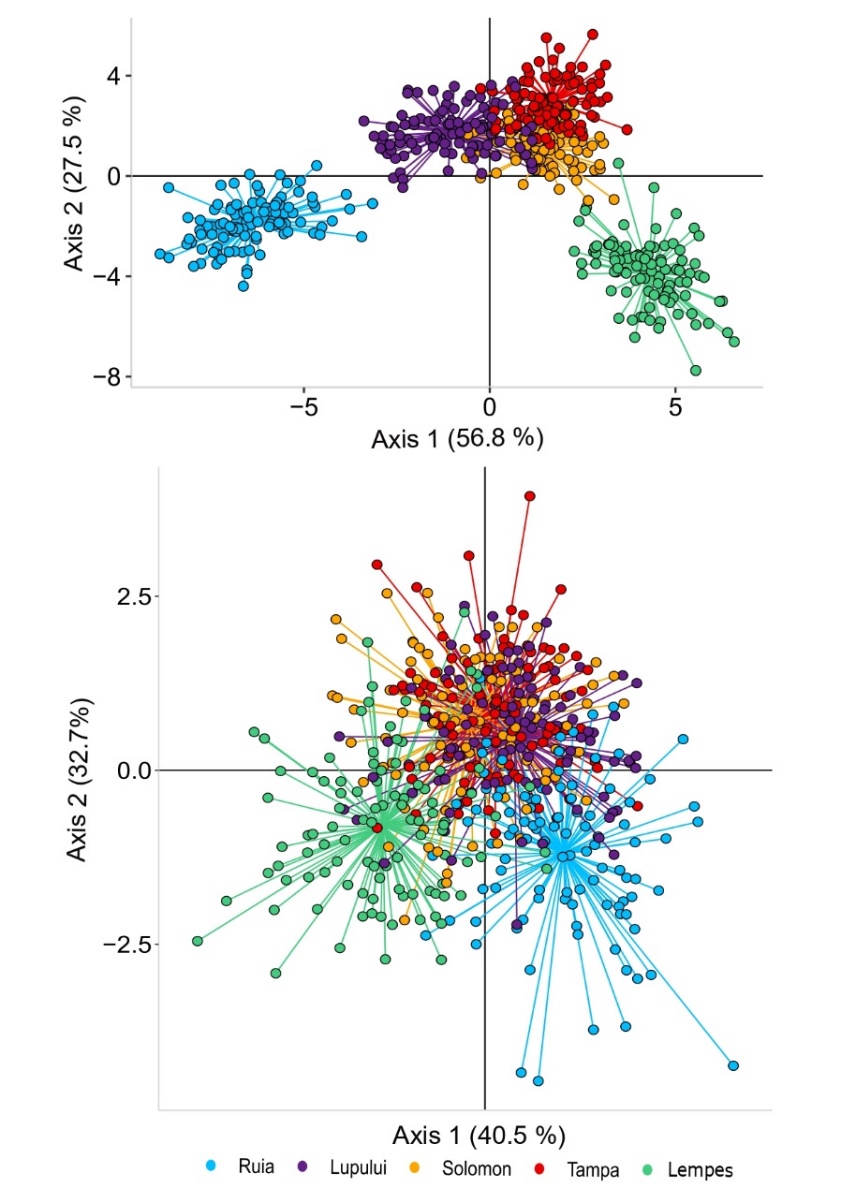


Figure S1: Discriminant analysis of principal components (DAPC) plots of the five Romanian Fagus sylvatica populations using SNP (above) and SSR (below) markers.


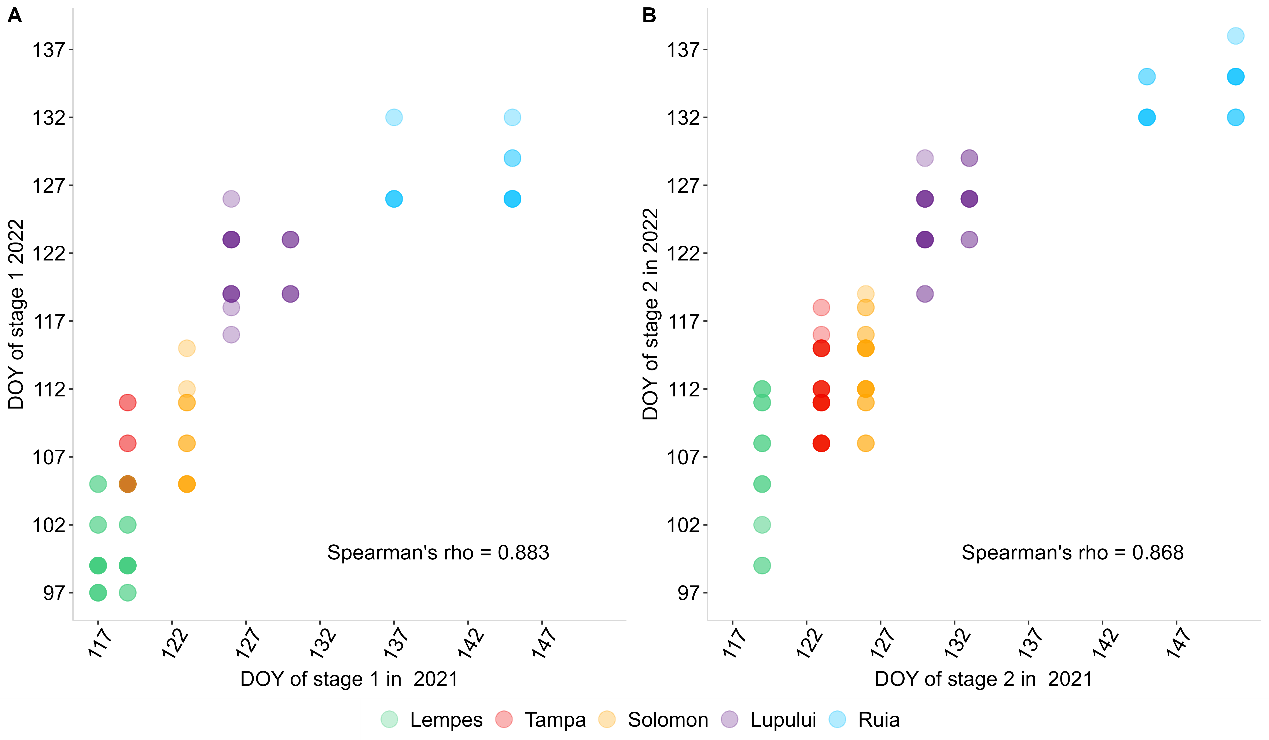


Figure S2: Correlation between the Day of Year (DOY) for bud burst in 2021 and 2022 for Stage 1 (A) and Stage 2 (B). Each point represents an individual, where denser colours indicate overlapping data points.


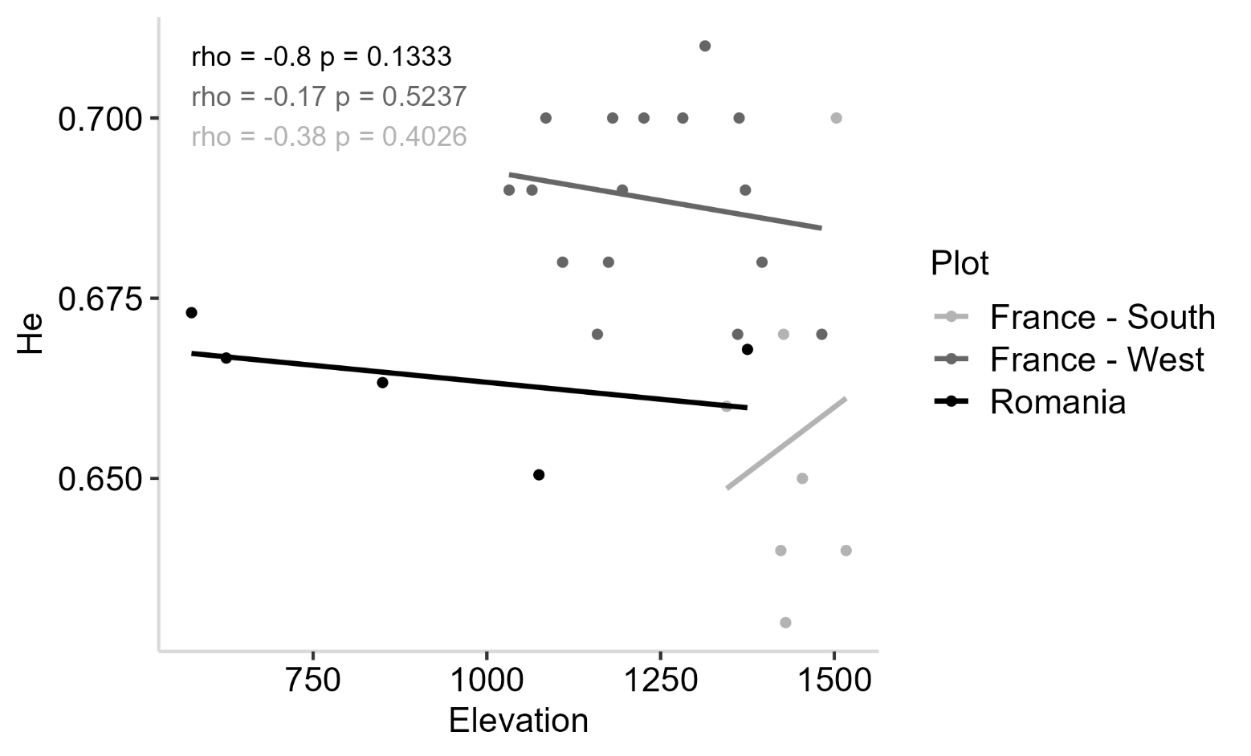


Figure S3: Regression plot between genetic diversity (He) and elevational gradient for Fagus sylvatica populations from Brasov, Romania and refuge locations at Mont Ventoux, France using SSR markers.


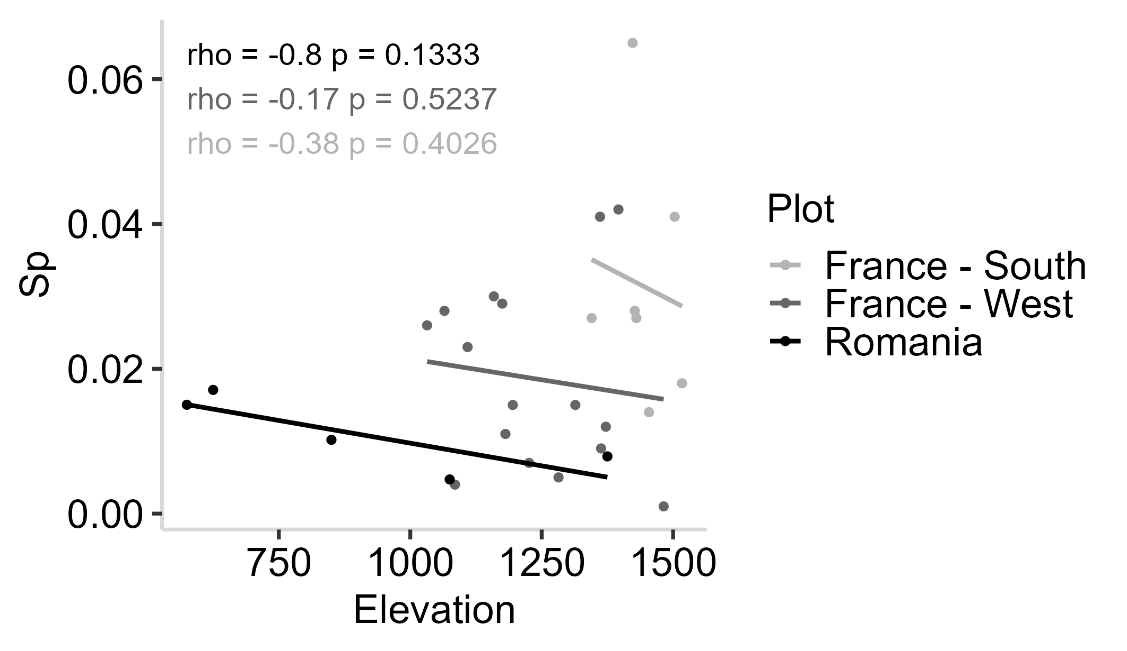


Figure S4: Strength of FSGS, assessed as Sp-values, decreased with increasing elevation in Fagus sylvatica populations at Mont Ventoux, France (based on data from Lander et al. 2021) and Brasov, Romania using microsatellite markers.
