# Supplementary material for: Differences in fine-scale spatial genetic structure of European beech populations along elevational gradients
Source: Research Square preprint supplement (doi:10.21203/rs.3.rs-4559673/v1), 2024-07-18
Supplement: Supplementary file 2 [file 98a3b9c9d9b4b5037b6b4b16.xlsx]

## Sheet: ReadMe
Differences in fine-scale spatial genetic structure of European beech populations along elevational gradients
Ourania Grigoriadou-Zormpa1,2, Selina Wilhelmi1,2, Boban Vucetic1, Mihnea Ioan Cezar Ciocîrlan,4, Markus Mueller1,2, Elena Ciocirlan3, Alexandru Lucian Curtu3, Mehdi Ben Targem5, Henning Wildhagen5, Oliver Gailing1,2,6, Katharina B. Budde1,7
1. Faculty for Forest Sciences and Forest Ecology, Forest Genetics and Forest Tree Breeding, University of Göttingen, Büsgenweg 2, 37077 Göttingen, Germany
2. Center for Integrated Breeding Research (CiBreed), Georg-August University, Von-Siebold-Str. 4, 37075 Göttingen, Germany
3. Faculty of Silviculture and Forest Engineering, Transilvania University of Brasov, Sirul Beethoven 1, 500123 Brasov, Romania
4. National Institute for Research and Development in Forestry (INCDS) "Marin Drăcea", Brasov Station, Romania
5. University of Applied Sciences and Arts Hildesheim /Holzminden/Göttingen (HAWK), Faculty of Resource Management, Büsgenweg 1a, 37077 Göttingen, Germany
6. Center of Biodiversity and sustainable Land Use (CBL), University of Göttingen, Büsgenweg 1, 37077 Göttingen, Germany
7. Northwest German Forest Research Institute, Professor-Oelkers-Strasse 6, 34346 Hann. Münden, Germany
Sheets Content:
SSR genotype data: comprising the sample number, population identifier and each SSR marker name (1st and 2nd allele), missing data is coded as 0
coordinates: GPS coordinates for each tree in the five beech populations in Romania, latitude and longitude in decimal degrees (WGS84)

## Sheet: SSR_genotypes
Sample_number	Population	sfc0018_1	sfc0018_2	sfc0161_1	sfc0161_2	sfc1063_1	sfc1063_2	sfc1143_1	sfc1143_2	FS3-04_1	FS3-04_2	mfs11_1	mfs11_2	FGSI0006_1	FGSI0006_2	FGSI0009_1	FGSI0009_2	FGSI0024_1	FGSI0024_2	FS_C1968_1	FS_C1968_2	FS_C2361_1	FS_C2361_2	FS_C7377_1	FS_C7377_2
40	Solomon	171	175	123	137	193	197	115	125	202	202	134	147	262	265	214	214	167	169	299	345	197	200	139	147
39	Solomon	169	171	123	125	191	201	115	123	202	202	134	134	261	262	214	214	167	169	297	299	200	206	147	147
16	Solomon	163	171	113	141	199	205	119	125	202	202	134	143	260	265	214	214	169	175	299	299	197	200	139	139
20	Solomon	163	169	125	125	191	191	123	127	196	208	136	143	260	261	214	214	169	175	303	308	200	206	139	139
30	Solomon	171	173	121	123	197	199	117	121	202	202	134	143	262	262	214	217	167	169	303	308	197	209	139	139
17	Solomon	161	169	111	125	201	205	125	127	202	202	134	143	262	265	217	217	169	175	299	299	197	200	139	139
47	Solomon	171	175	109	113	197	199	125	127	202	202	128	132	260	262	214	214	169	175	299	310	200	200	139	139
31	Solomon	161	171	123	125	193	205	123	127	196	202	134	136	261	262	214	217	169	175	299	299	197	206	139	139
37	Solomon	169	171	115	121	197	209	123	125	202	205	134	143	260	262	214	214	175	178	303	323	197	200	139	139
35	Solomon	161	169	121	123	193	195	123	131	202	205	134	134	262	264	214	217	169	175	305	310	197	200	139	139
24	Solomon	165	169	123	125	193	195	121	125	202	202	134	141	262	262	214	217	169	175	299	316	197	200	139	147
9	Solomon	163	169	123	123	207	207	121	123	202	202	132	134	262	262	214	214	169	175	308	312	200	200	139	147
91	Solomon	169	171	125	135	193	195	125	127	202	205	132	134	261	265	214	214	167	169	303	316	197	200	139	139
92	Solomon	163	173	113	121	193	207	127	131	202	205	132	132	260	260	214	217	169	169	308	310	200	200	139	139
93	Solomon	161	179	115	123	193	193	115	125	202	205	132	134	262	262	214	214	169	169	299	303	200	200	139	139
94	Solomon	165	171	125	125	187	211	125	127	202	202	132	134	262	262	214	214	167	169	299	305	197	200	139	139
95	Solomon	169	173	119	137	193	203	123	125	202	202	132	152	261	262	214	214	169	175	305	310	197	206	147	147
96	Solomon	151	163	121	123	193	197	101	123	202	202	134	136	260	260	214	217	169	169	299	299	200	206	139	139
97	Solomon	165	179	123	139	197	207	125	127	196	202	136	136	260	262	214	217	167	175	299	301	197	200	139	139
98	Solomon	161	165	121	125	193	207	125	125	202	202	132	134	260	262	214	214	175	175	299	299	197	200	139	139
99	Solomon	165	169	105	125	195	197	125	127	205	208	128	147	260	265	214	217	169	175	318	327	200	200	139	147
100	Solomon	165	169	105	121	197	197	115	121	202	202	134	136	260	262	217	217	167	167	297	299	197	197	139	147
51	Solomon	173	175	105	123	193	193	123	125	202	205	134	138	262	262	214	214	175	175	299	299	200	200	139	139
52	Solomon	169	173	113	121	193	193	117	131	202	205	134	143	260	265	217	220	169	175	299	301	197	197	139	139
54	Solomon	157	169	125	125	201	205	123	125	202	202	134	134	261	265	214	217	167	169	295	333	200	200	139	139
55	Solomon	169	169	113	117	195	207	125	125	202	202	134	136	262	265	214	217	167	169	299	310	200	209	139	139
56	Solomon	169	171	133	139	205	205	115	125	202	202	136	143	260	262	214	214	169	175	299	299	197	197	139	147
57	Solomon	171	173	123	125	195	195	123	125	202	202	134	136	260	262	217	217	169	169	299	305	197	197	136	139
58	Solomon	169	171	125	139	193	207	119	125	202	202	134	134	260	262	214	217	167	169	299	316	197	197	139	139
59	Solomon	169	171	121	121	193	201	113	125	202	202	134	141	260	262	217	217	169	175	314	316	200	200	136	139
60	Solomon	169	171	121	123	193	201	113	125	202	202	134	134	260	262	214	217	169	169	299	310	197	206	139	139
61	Solomon	165	169	125	135	193	195	125	125	202	202	132	134	262	262	214	214	169	175	299	299	194	200	139	147
62	Solomon	171	173	121	121	195	199	115	125	202	202	134	141	260	262	214	214	175	175	299	310	197	200	136	139
63	Solomon	179	179	121	121	201	201	125	127	196	202	132	134	260	261	214	217	169	175	308	316	194	206	136	139
64	Solomon	169	179	121	121	201	201	115	125	202	202	134	134	262	265	214	217	167	169	299	314	197	197	139	139
65	Solomon	169	173	123	135	193	201	125	125	202	202	134	136	260	260	214	217	175	175	301	301	197	200	139	147
66	Solomon	169	169	123	123	193	211	113	125	196	205	134	136	261	262	217	217	172	175	299	308	197	200	139	139
67	Solomon	165	177	121	121	193	197	123	127	202	202	134	143	260	261	214	217	169	175	299	305	197	200	139	139
68	Solomon	169	171	121	121	193	193	113	125	196	205	134	136	262	262	214	214	172	175	299	308	197	197	139	139
69	Solomon	169	175	123	125	193	203	123	125	202	205	132	136	260	262	214	214	175	175	301	305	197	200	139	139
70	Solomon	163	165	123	123	195	197	123	127	202	205	132	134	260	260	214	217	169	175	299	303	197	209	139	139
71	Solomon	169	175	105	139	197	211	115	125	202	202	134	147	260	262	214	214	169	175	299	299	197	200	139	147
72	Solomon	165	169	121	135	195	195	123	125	196	202	132	134	260	262	214	217	175	175	295	297	200	200	139	139
73	Solomon	173	175	111	125	199	205	125	125	202	205	132	134	260	260	214	214	169	176	299	299	197	206	133	139
74	Solomon	163	169	105	123	193	197	125	135	202	202	134	134	260	262	214	214	175	175	299	308	200	206	139	139
75	Solomon	169	169	123	127	197	207	125	125	202	205	132	134	260	262	217	217	169	169	310	310	197	200	139	139
76	Solomon	165	171	121	121	193	193	125	125	202	202	132	143	260	262	214	217	169	175	297	305	200	200	136	139
77	Solomon	169	179	113	121	193	193	125	125	202	202	134	145	260	262	214	214	169	175	299	305	200	200	147	147
78	Solomon	169	177	121	133	197	205	101	125	202	202	134	147	260	260	214	214	169	169	299	305	200	200	139	147
79	Solomon	159	169	123	125	197	207	115	123	202	205	132	132	260	261	214	214	169	175	299	310	197	206	139	147
80	Solomon	169	171	105	113	195	211	125	135	202	202	132	134	262	262	214	214	169	175	299	310	200	200	147	147
81	Solomon	151	175	113	139	197	199	125	125	202	202	134	145	262	262	217	217	169	175	299	310	200	200	133	139
82	Solomon	169	169	123	133	193	219	115	127	202	202	134	134	260	261	214	214	169	169	308	310	200	200	139	139
83	Solomon	161	169	121	133	197	205	125	125	202	205	132	136	260	261	214	217	169	175	299	310	200	200	139	147
84	Solomon	175	177	105	125	197	207	123	125	202	205	134	150	262	265	214	214	169	172	299	303	200	200	139	147
85	Solomon	169	169	121	123	193	207	125	125	196	196	134	145	262	262	214	214	169	169	310	316	197	206	139	139
86	Solomon	167	179	123	135	197	197	119	125	202	202	132	132	262	262	214	217	167	169	299	305	197	209	133	139
87	Solomon	169	171	121	139	193	197	125	125	202	202	134	136	260	262	214	217	169	175	310	320	200	200	139	139
88	Solomon	173	175	123	123	193	199	117	125	202	202	134	143	260	260	214	217	167	169	303	327	197	209	136	139
89	Solomon	161	171	113	139	193	207	123	125	196	202	134	134	262	262	217	217	169	175	299	299	197	200	136	139
90	Solomon	165	171	115	123	187	193	125	125	202	202	132	134	262	262	214	214	169	169	299	323	197	200	139	139
45	Solomon	161	171	115	123	193	197	115	125	202	202	134	141	262	265	214	217	167	169	308	318	197	209	139	147
50	Solomon	169	173	105	115	201	205	125	125	202	202	134	134	260	260	214	214	169	175	299	301	197	200	133	139
1	Lupului	179	179	117	125	193	197	115	141	202	205	132	134	260	265	214	217	169	172	299	299	197	197	139	147
2	Lupului	169	175	121	127	193	201	125	131	202	202	134	147	262	265	214	220	169	175	299	308	200	203	139	139
3	Lupului	169	175	121	127	193	201	125	131	202	202	134	147	262	265	214	214	169	169	299	314	197	200	139	139
4	Lupului	169	171	123	127	193	205	121	125	202	202	134	136	260	262	217	217	169	175	299	299	200	200	139	139
5	Lupului	173	175	127	139	193	199	123	127	199	205	132	147	260	262	214	217	169	175	299	301	197	197	139	139
6	Lupului	169	173	121	125	193	193	115	125	202	202	134	134	260	260	217	217	175	175	299	303	197	200	136	139
7	Lupului	169	175	111	115	193	207	125	125	202	202	134	134	260	261	214	214	169	169	299	310	200	200	139	139
8	Lupului	169	169	115	133	193	205	123	127	202	202	134	147	262	262	214	217	169	175	299	303	200	206	139	139
9	Lupului	151	169	123	125	193	207	121	127	202	202	134	143	260	261	214	214	169	175	305	310	197	197	139	139
10	Lupului	151	169	121	123	193	207	125	125	202	202	141	143	260	260	214	217	167	175	299	310	197	206	139	139
11	Lupului	165	175	121	121	205	207	115	115	202	202	132	143	262	264	214	214	169	169	299	299	200	206	139	139
12	Lupului	169	173	121	139	193	193	113	115	202	205	136	143	260	262	214	214	169	169	299	308	197	200	139	147
13	Lupului	163	169	105	125	197	205	115	117	202	205	132	143	260	261	214	217	169	169	299	299	197	197	139	147
14	Lupului	165	169	139	139	197	197	123	125	202	202	134	143	262	265	214	214	169	175	308	312	197	200	139	139
15	Lupului	163	175	125	133	201	201	125	125	202	202	134	141	262	265	214	214	169	175	299	305	197	206	139	139
16	Lupului	169	171	105	125	193	207	121	125	202	202	134	134	262	265	217	217	175	175	299	303	200	206	139	147
17	Lupului	173	177	105	121	193	195	115	119	205	205	134	136	260	265	214	214	169	175	305	308	197	197	139	139
18	Lupului	165	177	115	129	193	207	121	125	202	202	134	136	260	262	214	217	169	169	297	299	197	206	139	147
19	Lupului	171	175	121	125	187	195	115	125	202	202	134	147	260	262	214	214	169	169	301	310	197	206	139	139
20	Lupului	171	175	121	127	193	205	123	125	202	202	143	147	262	262	214	217	167	175	301	310	197	197	139	147
21	Lupului	171	173	125	133	193	193	115	121	202	205	136	147	260	265	217	217	167	175	299	310	200	200	133	139
22	Lupului	161	179	123	123	193	211	123	125	202	205	134	134	260	262	214	217	169	169	299	299	197	200	139	147
23	Lupului	175	179	139	139	197	205	123	127	202	202	134	136	262	262	214	214	169	169	303	312	200	200	139	139
24	Lupului	165	169	113	139	195	197	123	123	202	205	134	134	262	262	214	217	169	169	299	308	197	197	139	139
25	Lupului	171	175	121	123	201	207	121	125	202	202	134	134	260	262	214	214	169	175	299	310	197	200	139	139
26	Lupului	171	175	109	123	193	201	121	125	202	202	134	143	260	260	214	220	175	175	310	314	197	200	139	139
27	Lupului	165	169	121	121	193	193	123	125	202	202	132	136	260	262	214	220	169	169	299	310	200	206	139	139
28	Lupului	165	169	121	125	193	193	115	123	202	202	132	136	260	262	214	214	169	175	308	310	197	206	139	139
29	Lupului	151	161	109	131	199	205	125	127	202	202	136	143	260	260	214	214	169	169	299	299	197	200	147	147
30	Lupului	165	165	121	123	193	195	115	123	202	202	134	136	260	262	214	214	175	175	299	310	200	206	139	147
31	Lupului	169	169	123	135	191	207	125	125	202	202	134	134	261	265	214	220	169	169	299	299	197	209	139	147
32	Lupului	161	163	105	121	197	207	115	125	202	205	132	134	260	265	214	214	169	169	299	310	197	200	139	147
1	Tampa	171	175	123	137	195	209	113	127	202	202	134	136	260	262	214	214	169	175	299	308	197	200	139	139
2	Tampa	169	171	105	125	193	211	115	135	202	202	134	136	262	265	214	217	169	175	299	299	197	200	133	139
3	Tampa	163	171	125	137	193	207	125	125	202	202	132	136	262	262	214	217	175	175	299	312	197	200	139	139
4	Tampa	163	169	121	123	205	211	115	125	202	202	132	134	265	265	214	217	169	169	299	318	200	206	147	147
5	Tampa	171	173	113	121	193	193	122	122	202	202	132	136	260	262	214	217	169	175	299	299	200	206	139	139
6	Tampa	161	169	123	139	193	195	117	125	196	202	134	143	260	262	214	217	169	175	299	310	200	200	139	147
7	Tampa	171	175	131	139	193	195	125	125	202	202	134	136	260	262	214	217	169	175	297	308	200	215	133	139
8	Tampa	161	171	125	129	195	195	125	125	202	205	132	141	260	262	214	217	169	175	299	299	197	200	139	147
9	Tampa	169	171	115	125	195	205	115	125	202	205	134	136	260	262	214	214	167	175	299	299	200	209	139	147
10	Tampa	161	169	105	117	201	201	117	135	202	202	138	147	260	260	214	220	169	169	301	316	200	206	136	139
11	Tampa	165	169	105	115	193	207	121	125	202	202	134	134	262	265	214	217	169	169	305	310	200	200	139	139
12	Tampa	163	169	113	123	197	205	115	123	202	205	134	136	260	260	209	214	169	169	310	310	197	200	139	147
13	Tampa	169	171	105	125	197	205	115	117	202	202	132	136	262	265	214	214	175	175	299	310	197	200	139	147
14	Tampa	163	173	121	121	205	205	115	125	202	202	134	141	265	265	214	214	169	169	299	310	197	209	136	139
15	Tampa	161	179	117	121	195	199	123	131	202	205	134	143	262	265	209	217	175	175	299	299	200	200	139	139
16	Tampa	165	171	113	139	197	199	113	125	202	202	134	147	260	264	214	217	169	169	299	314	197	200	139	147
17	Tampa	169	173	113	139	199	207	115	117	202	205	134	134	262	264	214	217	169	169	299	299	197	200	139	139
18	Tampa	151	163	123	125	199	205	113	115	202	202	134	141	260	262	217	217	169	175	305	310	200	200	139	147
19	Tampa	165	179	125	125	197	197	125	125	202	202	128	134	262	265	214	214	169	175	299	301	200	206	139	139
20	Tampa	161	165	113	123	193	207	125	125	202	202	136	136	260	264	214	217	169	178	299	299	200	200	139	139
21	Tampa	165	169	125	125	193	207	125	125	202	205	134	136	260	265	214	214	169	178	299	308	197	197	139	147
22	Tampa	165	169	121	141	193	197	121	125	202	202	134	136	260	264	214	214	167	169	299	314	197	197	139	147
23	Tampa	173	175	119	141	205	207	119	125	202	205	134	134	264	264	214	217	175	175	299	310	200	200	139	139
24	Tampa	169	173	105	123	205	207	123	135	202	202	132	134	260	260	214	214	169	178	299	308	200	200	139	139
25	Tampa	161	163	113	125	197	207	115	125	202	205	132	134	260	260	214	217	172	175	308	310	200	206	139	139
26	Tampa	157	169	125	135	197	201	125	125	202	202	132	134	262	264	214	217	167	167	299	310	197	200	139	139
27	Tampa	169	169	121	139	193	195	125	127	202	202	134	147	260	262	214	217	169	175	299	299	200	200	139	147
28	Tampa	169	171	121	135	193	197	125	125	202	202	134	134	260	261	214	214	169	175	0	0	200	206	139	139
29	Tampa	171	173	121	137	207	207	113	125	202	205	134	147	260	260	214	214	175	178	299	299	200	206	139	139
30	Tampa	169	171	115	121	193	197	125	125	202	202	134	134	261	262	217	217	169	172	299	310	197	200	136	136
31	Tampa	169	171	123	125	199	207	123	135	202	202	136	138	260	261	214	214	169	169	310	323	200	206	139	139
32	Tampa	169	171	123	133	193	195	115	125	202	205	132	132	260	262	214	217	169	175	299	308	197	200	139	139
33	Tampa	165	169	121	125	195	197	125	127	202	202	143	145	262	265	214	214	169	175	299	310	197	200	139	139
34	Tampa	171	173	115	125	193	193	115	125	202	202	132	132	260	264	214	217	167	175	299	299	200	200	136	147
35	Tampa	179	179	113	113	193	199	125	125	202	202	132	141	260	260	214	214	172	172	305	310	197	200	139	147
36	Tampa	169	179	123	123	207	211	119	125	202	205	128	136	260	264	217	217	167	172	299	299	200	200	139	147
37	Tampa	169	173	139	139	201	209	125	125	202	202	132	141	260	260	214	214	175	175	310	318	197	200	139	139
38	Tampa	169	169	121	123	193	205	109	123	202	202	134	147	260	262	214	220	169	169	305	310	197	200	139	139
39	Tampa	165	177	113	123	199	203	117	125	202	205	132	134	260	260	214	217	167	172	305	310	197	200	139	147
40	Tampa	169	171	105	113	193	201	125	127	202	202	141	143	260	262	214	217	175	175	299	310	197	197	133	139
41	Tampa	169	175	107	123	193	199	119	123	196	202	134	136	262	265	214	217	169	175	299	305	197	200	139	139
42	Tampa	163	165	123	147	193	205	119	125	196	202	136	136	260	262	214	217	169	175	299	299	200	206	139	139
43	Tampa	169	175	105	121	193	197	117	125	202	202	136	143	260	260	217	217	169	169	301	314	197	200	139	139
44	Tampa	165	169	137	137	193	201	117	125	202	202	132	134	260	262	214	214	169	175	299	305	197	197	139	139
45	Tampa	173	175	113	139	199	203	123	125	202	202	136	147	260	262	214	217	169	175	301	312	194	197	139	147
46	Tampa	163	169	121	139	205	205	115	123	202	202	132	136	262	265	214	214	167	175	299	299	200	206	136	139
47	Tampa	169	169	121	139	193	193	117	123	202	202	132	134	262	264	214	217	169	169	297	299	197	200	139	147
48	Tampa	165	171	121	129	193	197	125	131	202	202	134	147	262	262	214	217	169	175	297	299	200	200	139	139
49	Tampa	169	179	123	125	197	199	121	125	202	202	143	147	262	265	214	217	169	175	299	310	197	200	139	147
50	Tampa	169	177	123	137	193	199	125	127	202	205	134	134	260	264	214	217	167	169	299	310	200	206	139	147
51	Tampa	159	169	113	123	193	201	121	123	205	205	134	134	262	262	214	214	175	175	299	310	200	200	133	147
52	Tampa	169	171	121	121	195	199	115	121	202	202	134	136	260	265	214	214	169	169	299	310	197	200	139	147
53	Tampa	151	175	105	125	193	197	115	123	202	205	134	134	260	265	214	217	175	175	297	312	200	200	139	139
54	Tampa	169	169	113	135	193	195	123	125	202	202	132	136	262	262	214	217	169	169	301	308	200	200	136	139
55	Tampa	161	169	117	133	197	205	125	125	199	205	134	147	261	261	214	214	167	175	299	301	197	206	136	139
56	Tampa	175	177	123	135	193	209	121	123	202	202	134	136	264	264	214	214	169	175	299	308	197	200	139	139
57	Tampa	169	169	113	125	193	209	125	125	202	202	134	143	261	264	214	217	169	169	299	299	197	206	139	139
58	Tampa	167	179	125	137	187	193	123	125	202	202	132	134	260	262	214	217	167	169	297	299	197	206	139	139
59	Tampa	169	171	105	133	201	205	125	129	202	202	134	147	260	262	214	217	167	169	295	299	197	197	139	147
60	Tampa	173	175	121	123	197	205	125	127	202	202	134	141	260	260	217	217	169	169	299	299	194	200	139	139
61	Tampa	161	171	105	135	187	197	123	125	202	202	134	136	260	260	214	217	167	181	299	299	197	206	139	139
62	Tampa	165	171	121	123	197	205	115	117	202	205	134	134	260	265	214	214	169	169	299	299	200	200	139	139
63	Tampa	161	171	121	123	197	205	123	137	202	202	132	134	260	265	217	220	169	175	299	308	200	200	139	147
64	Tampa	169	173	117	125	193	209	121	127	202	202	134	134	262	262	214	214	172	175	299	310	197	200	139	139
65	Tampa	179	179	123	127	193	193	115	125	202	202	134	134	262	262	214	217	169	169	299	310	200	200	139	147
66	Tampa	169	175	121	127	193	193	125	125	202	202	132	134	260	262	214	214	169	175	299	314	197	200	139	139
67	Tampa	169	175	105	123	193	193	113	131	202	205	134	136	261	262	214	217	169	175	0	0	197	200	139	139
68	Tampa	169	171	105	154	199	201	115	129	202	202	132	147	262	265	214	214	169	169	308	312	197	200	139	139
69	Tampa	173	175	113	125	193	195	125	127	202	202	134	136	262	262	214	217	169	175	295	299	197	197	139	139
70	Tampa	169	173	123	135	193	201	115	125	202	205	132	136	262	265	214	217	169	175	299	308	197	200	139	147
71	Tampa	169	175	115	123	193	211	123	125	202	202	134	141	262	265	214	220	169	175	299	299	197	197	136	147
72	Tampa	169	169	121	123	193	207	117	119	202	202	134	136	261	265	214	217	167	175	310	316	200	200	139	139
73	Tampa	151	169	123	141	193	207	117	125	202	205	134	136	260	265	217	217	167	175	299	310	200	206	139	139
74	Tampa	151	169	121	139	193	207	115	119	196	202	134	138	265	265	214	217	175	175	310	316	200	200	139	139
75	Tampa	165	175	121	135	197	205	119	125	202	202	132	134	265	265	214	214	169	175	299	310	200	200	133	139
76	Tampa	169	173	121	121	193	197	119	125	202	208	136	147	260	262	214	214	175	175	299	320	197	200	139	139
77	Tampa	163	169	113	113	193	195	125	127	202	202	132	136	262	262	214	217	169	172	299	305	197	200	136	139
78	Tampa	165	169	105	113	191	193	123	125	202	202	134	136	262	262	214	214	167	175	299	299	197	200	139	139
79	Tampa	163	175	113	139	193	195	125	125	202	202	134	141	262	265	214	220	169	175	297	299	197	200	139	139
80	Tampa	169	171	139	139	197	197	125	125	202	202	136	141	260	265	214	217	169	175	299	312	197	200	139	139
81	Tampa	173	177	121	139	195	207	125	125	202	202	134	143	260	260	214	217	167	172	305	310	200	200	139	139
82	Tampa	165	177	121	125	193	205	119	125	202	205	132	134	260	265	214	217	175	175	297	299	200	200	139	139
83	Tampa	171	175	121	129	197	199	115	125	202	202	132	134	260	262	217	217	169	175	299	299	197	206	139	139
84	Tampa	171	175	121	121	195	195	125	125	202	202	134	150	262	265	214	217	169	175	299	305	200	200	139	139
85	Tampa	171	173	125	135	193	201	115	121	202	202	134	134	260	262	217	217	175	175	310	312	200	200	139	139
86	Tampa	161	179	105	113	193	197	125	127	202	202	132	134	262	262	214	217	169	175	299	310	197	200	139	139
87	Tampa	175	179	121	123	195	201	123	125	202	202	132	134	260	260	214	217	169	175	299	299	200	209	139	147
88	Tampa	165	169	123	125	191	205	125	125	202	205	134	134	262	262	214	217	169	175	299	299	197	197	147	147
89	Tampa	171	175	113	121	195	195	125	125	202	202	134	134	262	262	214	217	169	169	299	316	200	200	139	139
90	Tampa	171	175	121	121	195	205	115	125	202	202	134	134	260	262	217	217	169	175	299	308	197	206	139	147
91	Tampa	165	169	125	139	193	195	115	115	202	205	132	141	260	262	214	217	167	175	297	299	197	206	147	147
92	Tampa	165	169	121	139	193	205	115	125	202	208	134	147	262	262	214	217	169	175	299	308	194	206	139	147
93	Tampa	151	161	121	139	193	193	123	125	205	208	134	134	260	262	214	220	175	175	303	327	200	206	139	147
94	Tampa	165	165	129	133	193	193	113	125	202	202	134	134	265	265	214	220	175	175	297	303	197	206	139	147
95	Tampa	169	169	113	121	193	197	115	125	202	202	134	143	261	262	214	214	167	175	316	316	200	206	136	139
1	Ruia	169	169	109	121	187	187	123	125	202	202	134	136	262	265	214	214	169	175	299	308	197	200	136	147
2	Ruia	169	169	137	139	195	197	115	125	202	205	132	134	262	265	214	217	175	175	310	312	197	200	136	147
3	Ruia	151	165	105	105	195	197	125	125	202	208	134	134	260	262	214	217	169	175	299	299	197	197	139	139
4	Ruia	169	169	105	105	193	205	127	127	202	202	132	134	260	260	214	214	169	175	299	310	197	206	139	139
5	Ruia	169	173	105	125	193	207	115	125	202	205	134	136	265	265	214	217	167	175	299	303	197	200	139	147
6	Ruia	179	179	105	123	193	197	125	125	202	208	132	136	260	262	214	217	169	175	301	301	197	197	136	139
7	Ruia	157	171	121	123	187	193	115	123	202	202	141	143	260	262	217	217	169	175	299	308	200	206	139	139
8	Ruia	163	163	123	123	193	197	115	121	202	205	134	136	262	262	214	217	175	175	299	314	197	206	139	147
9	Ruia	169	171	121	123	187	195	119	123	202	205	134	136	262	262	217	217	169	175	299	299	197	200	139	139
10	Ruia	169	173	113	123	195	199	123	125	202	205	134	134	260	260	214	217	169	175	299	310	197	197	139	147
11	Ruia	171	171	121	131	195	197	123	125	202	205	134	141	260	262	214	214	167	169	299	310	200	200	139	139
12	Ruia	163	173	105	113	195	207	123	127	202	205	134	136	260	262	214	214	169	175	299	299	200	200	139	139
13	Ruia	161	169	121	127	193	205	113	113	202	202	132	136	260	260	214	214	169	175	310	314	200	209	139	139
14	Ruia	173	179	105	139	203	207	115	117	202	202	132	134	262	262	217	217	169	169	295	299	197	197	139	139
15	Ruia	169	179	105	139	193	193	123	131	202	205	134	134	260	262	214	217	169	169	305	310	200	200	139	139
16	Ruia	159	171	121	135	197	205	115	115	202	208	132	134	262	265	214	214	175	178	299	299	200	200	139	139
17	Ruia	169	175	121	123	195	207	115	115	202	208	134	134	260	262	214	217	169	175	310	310	197	200	139	139
18	Ruia	163	173	105	139	199	203	101	123	202	202	134	134	260	260	214	214	169	169	301	314	200	200	139	139
19	Ruia	161	179	137	137	197	199	127	127	202	202	132	136	260	265	217	217	169	169	299	308	197	200	139	147
20	Ruia	169	171	105	125	193	197	115	125	202	202	134	136	262	262	214	217	172	175	310	314	197	200	139	139
21	Ruia	163	169	121	139	193	195	115	123	202	202	134	147	260	260	214	214	169	175	299	310	197	200	139	139
22	Ruia	173	179	123	123	205	207	115	121	202	205	134	134	260	260	217	217	169	175	299	314	197	200	139	139
23	Ruia	169	171	123	139	193	197	123	135	202	205	134	134	260	265	214	217	175	175	299	299	197	200	139	147
24	Ruia	171	179	121	139	195	197	115	129	202	202	132	134	260	262	214	214	167	169	299	299	206	206	139	147
25	Ruia	163	179	105	121	195	205	115	125	202	208	132	143	260	262	214	214	169	175	299	305	197	197	139	139
26	Ruia	179	179	105	123	195	205	115	115	205	208	134	136	262	262	214	217	169	175	297	299	203	206	139	139
27	Ruia	163	169	123	139	197	207	125	125	202	202	134	143	260	262	214	217	169	175	299	310	206	206	139	139
28	Ruia	179	179	117	123	195	203	115	123	202	202	132	134	260	262	217	217	169	175	303	308	197	200	139	147
29	Ruia	169	171	105	121	193	207	125	125	202	202	134	134	260	262	214	217	175	175	301	310	197	197	139	139
30	Ruia	163	169	121	121	187	193	117	125	202	202	134	136	262	265	217	220	169	175	295	310	197	200	139	147
31	Ruia	163	177	129	139	203	205	115	123	202	205	141	143	262	262	217	220	175	175	299	316	197	200	147	147
32	Ruia	159	179	137	139	195	207	125	125	202	202	132	134	262	262	214	220	169	175	299	301	200	206	139	139
33	Ruia	165	169	105	121	195	207	115	125	202	205	143	143	260	265	214	217	169	169	299	310	197	197	139	139
34	Ruia	165	169	131	139	193	195	125	137	196	202	143	143	262	262	214	214	175	175	301	301	200	200	139	139
35	Ruia	163	163	105	123	195	207	115	123	205	205	134	136	260	262	217	217	169	169	305	310	197	200	139	139
36	Ruia	179	179	123	125	193	193	121	125	202	205	134	143	253	253	0	0	0	0	289	289	0	0	0	0
37	Ruia	163	169	109	135	191	193	125	125	202	202	132	136	260	260	214	214	167	175	299	301	200	206	139	139
38	Ruia	165	173	113	121	197	199	125	125	202	202	136	141	260	260	217	217	169	175	299	299	197	200	139	139
39	Ruia	169	179	113	121	193	195	123	137	202	202	132	134	260	262	214	214	167	175	299	310	200	200	139	139
40	Ruia	169	173	105	113	197	207	125	125	202	202	134	147	262	262	217	217	169	169	299	303	200	200	139	147
41	Ruia	169	171	113	123	195	197	115	125	202	202	134	134	265	265	214	217	169	175	301	308	197	200	139	147
42	Ruia	169	169	105	121	195	205	113	115	202	208	132	134	260	260	214	217	169	175	299	301	200	209	139	139
43	Ruia	169	171	133	137	193	207	125	125	202	208	132	134	262	265	214	214	169	175	297	308	197	197	139	139
44	Ruia	163	173	105	123	193	193	115	125	202	202	134	136	262	265	214	214	167	169	308	310	197	197	139	139
45	Ruia	169	169	105	121	193	197	119	125	202	202	134	136	260	265	214	217	169	175	310	310	197	197	139	139
46	Ruia	169	171	113	123	193	193	113	125	202	205	134	134	260	260	217	217	167	169	305	310	197	197	139	139
47	Ruia	169	179	113	123	193	207	123	125	202	202	128	132	260	265	214	217	167	175	305	310	197	200	139	139
48	Ruia	163	169	121	123	195	205	113	123	202	202	128	134	262	262	214	217	169	175	299	299	197	200	139	139
49	Ruia	169	169	123	137	193	195	123	125	202	202	132	143	260	262	214	217	169	175	297	299	200	200	139	139
50	Ruia	163	171	105	113	193	199	123	131	202	205	136	147	262	262	214	214	175	175	299	314	200	200	139	147
51	Ruia	169	179	123	139	199	201	115	125	202	205	134	134	260	262	214	214	169	175	297	299	197	200	139	139
52	Ruia	169	171	125	129	193	199	113	127	202	205	134	134	260	260	214	217	169	175	297	299	200	200	139	147
53	Ruia	159	169	113	117	195	203	115	121	202	208	134	134	262	262	214	217	169	175	299	320	197	197	139	139
54	Ruia	169	169	135	137	193	193	113	123	202	205	134	143	260	262	214	214	169	175	299	301	197	200	139	139
51	Lempes	161	175	123	123	205	205	115	115	202	202	132	134	265	265	217	217	169	169	299	329	197	200	139	147
52	Lempes	169	179	113	121	193	195	105	115	202	202	134	134	262	262	214	217	167	167	299	310	197	206	147	147
53	Lempes	175	175	123	125	193	199	127	127	202	202	134	134	265	265	214	214	169	169	299	305	197	200	139	139
54	Lempes	171	173	123	131	197	201	113	123	202	202	134	134	260	262	214	217	169	169	299	314	200	200	139	139
55	Lempes	169	173	125	139	195	195	123	125	202	202	132	132	261	265	214	214	167	175	305	335	197	197	139	139
56	Lempes	169	169	121	125	191	205	115	115	202	208	136	147	262	265	214	214	167	169	299	316	197	200	136	139
57	Lempes	165	179	121	123	195	203	123	125	202	202	145	147	262	262	214	217	167	175	299	299	197	197	133	139
58	Lempes	169	169	121	123	193	195	113	121	202	202	134	143	262	262	217	217	167	169	299	318	197	197	139	147
59	Lempes	161	171	123	139	195	203	113	123	202	205	132	134	260	262	214	217	169	175	299	299	197	197	139	139
60	Lempes	161	169	121	123	193	197	119	123	202	202	134	145	262	265	214	214	167	169	299	301	197	197	139	139
61	Lempes	161	163	139	139	205	205	117	123	202	202	136	141	260	260	214	217	175	175	299	301	197	200	136	139
62	Lempes	163	165	121	121	195	207	123	125	202	202	132	145	262	265	214	217	167	169	297	297	200	206	139	147
63	Lempes	167	175	123	123	197	205	117	123	202	205	132	134	260	262	214	217	175	178	297	299	200	209	139	147
64	Lempes	161	169	115	121	203	203	125	125	202	202	132	134	262	264	214	217	167	175	299	308	197	200	139	139
65	Lempes	165	179	113	121	197	197	121	125	202	202	141	141	260	265	214	214	167	169	305	308	197	200	139	139
66	Lempes	169	177	109	125	199	207	115	115	202	202	134	141	260	262	217	217	169	175	299	299	200	200	139	147
67	Lempes	169	169	125	125	193	207	115	123	202	202	134	143	260	262	214	214	169	175	299	303	200	200	139	147
68	Lempes	163	171	121	139	197	207	105	125	202	205	143	147	260	262	214	217	169	175	299	299	197	200	147	147
69	Lempes	165	169	115	125	201	201	125	125	202	202	134	134	262	262	217	217	167	175	310	318	200	200	139	139
70	Lempes	163	171	121	125	205	205	125	127	202	202	134	134	260	262	214	214	169	175	314	323	200	209	139	147
71	Lempes	169	171	121	125	197	205	121	127	202	202	132	134	262	262	214	214	169	169	299	323	200	200	139	139
72	Lempes	161	169	121	121	201	201	125	127	202	202	132	143	260	260	214	217	169	175	299	314	200	209	139	147
73	Lempes	161	169	121	121	199	205	125	127	202	202	134	134	260	260	214	217	169	175	299	314	197	209	139	147
74	Lempes	159	179	123	123	193	193	123	123	202	202	134	141	260	262	214	217	167	169	299	299	197	209	139	147
75	Lempes	163	169	123	125	193	205	123	125	202	202	132	134	260	262	214	214	167	169	299	299	200	200	139	139
76	Lempes	171	171	125	129	199	211	115	127	202	205	132	134	259	259	214	214	169	175	299	299	197	200	133	147
77	Lempes	175	177	123	125	193	199	125	127	202	202	134	147	260	265	214	214	169	169	299	299	197	209	139	139
78	Lempes	161	173	131	145	193	197	125	127	202	205	134	134	262	265	214	217	167	175	301	312	197	200	139	139
79	Lempes	165	165	121	139	195	197	115	125	202	208	134	134	262	262	217	217	169	169	299	308	200	200	139	147
80	Lempes	163	163	105	139	205	207	123	125	205	205	134	143	262	262	214	217	169	175	299	299	197	200	139	139
81	Lempes	171	177	115	125	193	199	125	125	202	208	132	136	262	262	217	217	169	175	299	327	197	200	139	139
82	Lempes	165	165	121	125	197	205	121	125	205	208	134	143	262	262	214	217	172	175	299	301	200	200	139	147
83	Lempes	169	175	123	131	195	199	117	125	202	202	134	145	262	265	214	217	169	169	299	318	197	200	139	139
84	Lempes	161	169	131	135	193	209	113	125	202	202	132	134	260	260	217	217	169	169	299	310	197	209	139	147
85	Lempes	163	163	121	141	197	207	121	125	202	205	134	143	262	262	214	217	169	169	299	316	197	209	136	139
86	Lempes	165	173	111	125	193	199	115	123	196	202	132	143	262	265	214	217	175	175	299	299	197	197	139	139
87	Lempes	159	169	123	125	195	205	115	125	202	205	132	132	260	264	214	214	169	169	299	299	197	200	139	139
88	Lempes	159	161	113	129	195	211	115	115	202	208	134	134	260	262	214	214	169	175	299	299	197	200	139	139
89	Lempes	161	171	113	115	195	195	115	123	202	202	134	147	262	262	217	217	169	172	310	314	197	200	139	147
90	Lempes	159	165	123	125	195	201	123	125	202	202	132	147	261	265	214	217	169	175	299	299	194	200	139	139
91	Lempes	157	177	121	123	193	207	123	123	196	202	132	134	262	262	214	214	169	169	299	299	200	200	136	147
92	Lempes	161	169	105	139	197	207	123	123	202	202	132	134	265	265	217	220	167	175	299	308	200	200	139	139
55	Ruia	169	179	125	139	195	207	115	121	202	202	132	134	260	262	214	214	175	175	312	327	197	200	139	139
56	Ruia	165	169	113	139	193	203	115	121	202	205	132	134	262	262	214	217	169	175	299	299	197	200	139	139
57	Ruia	163	169	105	123	187	193	125	125	202	202	136	143	260	265	214	217	169	175	299	310	197	197	139	147
58	Ruia	171	179	121	123	193	205	123	125	202	202	132	134	260	265	214	214	167	169	299	310	197	206	139	139
59	Ruia	171	179	121	139	195	207	113	123	205	205	134	136	260	265	214	214	169	175	310	314	200	200	139	147
60	Ruia	165	171	121	121	193	199	121	125	202	205	128	134	260	262	214	217	169	175	299	320	197	200	139	139
61	Ruia	173	173	123	139	199	207	125	125	202	202	132	134	260	261	214	217	169	175	299	314	197	209	139	147
62	Ruia	161	173	105	123	193	207	125	125	202	202	145	150	260	260	214	217	169	175	299	314	197	209	139	147
63	Ruia	163	169	121	125	197	207	115	125	202	202	134	145	262	262	217	220	175	175	312	314	197	206	139	147
64	Ruia	163	169	123	133	193	205	115	125	202	202	136	145	265	265	214	214	169	178	297	310	200	206	139	147
65	Ruia	159	169	121	141	193	195	115	125	202	202	132	132	265	265	214	214	169	169	305	314	200	206	147	147
66	Ruia	169	179	121	123	193	201	115	125	202	202	134	136	260	260	214	217	167	169	310	312	200	200	139	139
67	Ruia	151	163	113	139	193	195	121	123	202	202	134	141	262	262	214	217	175	175	299	318	197	206	136	139
68	Ruia	163	171	121	135	197	203	125	125	202	208	132	134	260	262	214	217	175	175	299	310	197	200	139	147
69	Ruia	165	171	125	152	195	205	115	125	202	208	134	136	262	262	214	214	175	175	299	305	197	200	139	139
70	Ruia	161	163	121	125	205	207	123	123	202	205	134	136	260	260	214	217	169	169	299	314	200	206	139	147
71	Ruia	171	175	121	123	199	203	115	115	199	202	132	134	262	262	214	214	167	175	299	299	200	200	139	139
72	Ruia	169	179	107	121	195	207	115	125	202	202	132	134	260	264	217	220	175	175	299	314	197	197	139	147
73	Ruia	163	171	121	123	197	197	115	125	202	202	134	136	260	262	214	217	169	175	297	299	197	200	139	147
74	Ruia	169	171	125	129	195	205	121	125	202	202	134	134	264	265	217	217	169	175	299	299	197	200	139	139
75	Ruia	159	171	125	135	193	207	115	117	202	208	132	134	260	260	217	217	175	175	299	310	200	200	139	139
76	Ruia	169	171	105	125	193	207	123	123	202	202	134	143	260	260	214	214	167	175	310	314	200	200	139	147
77	Ruia	163	173	121	137	195	207	123	125	202	205	134	141	261	262	214	214	169	175	299	310	197	200	139	147
78	Ruia	169	179	123	135	193	207	115	123	202	202	134	134	262	262	214	217	175	175	299	299	197	197	139	139
79	Ruia	169	169	105	123	193	193	115	125	202	202	132	134	260	262	214	217	175	175	295	310	197	200	139	139
80	Ruia	169	177	121	123	197	207	115	125	202	202	134	134	260	265	214	214	169	175	299	310	200	206	139	147
81	Ruia	169	171	123	139	193	203	117	123	202	202	134	143	260	262	214	217	169	175	295	301	197	197	139	139
82	Ruia	173	173	121	123	193	193	125	141	196	202	134	134	260	262	214	214	167	175	299	299	197	197	139	139
83	Ruia	171	179	121	121	193	205	113	117	205	208	136	136	260	262	214	217	167	175	297	299	197	197	139	147
84	Ruia	169	173	121	123	193	205	115	125	202	202	134	134	260	262	214	217	167	169	299	335	200	206	139	139
85	Ruia	173	179	121	121	207	207	123	123	202	208	134	134	261	261	214	214	169	175	299	314	197	200	139	147
86	Ruia	169	169	115	137	195	209	125	125	196	202	132	143	261	265	214	217	169	178	297	312	197	206	139	139
87	Ruia	161	169	121	121	205	207	125	125	205	205	132	143	262	262	217	217	169	169	299	305	200	209	139	139
88	Ruia	157	179	121	121	193	193	115	123	205	208	134	134	260	262	214	217	169	175	299	310	197	200	139	147
89	Ruia	169	169	121	125	197	205	115	115	202	205	134	134	260	265	217	217	169	175	295	299	200	209	139	139
90	Ruia	163	173	115	139	193	203	125	125	205	205	134	147	260	262	214	214	169	175	295	310	197	197	139	139
91	Ruia	165	169	123	123	187	193	115	125	202	205	132	143	262	264	214	217	169	175	310	310	197	206	139	147
92	Ruia	169	179	121	123	195	203	125	125	202	202	132	134	260	261	214	220	167	169	297	305	197	209	139	139
93	Ruia	163	179	121	123	199	201	115	123	202	205	134	143	260	262	217	220	169	175	295	299	203	206	147	147
94	Ruia	169	169	105	135	193	207	123	123	202	208	136	141	260	260	214	214	166	175	314	329	197	206	139	139
95	Ruia	161	169	105	105	193	207	123	125	202	202	134	141	260	262	214	217	167	175	299	299	197	206	139	139
96	Ruia	169	169	121	123	197	205	101	115	202	202	132	134	260	265	214	214	167	169	299	299	197	197	147	147
97	Ruia	169	179	111	125	193	205	121	125	202	202	132	143	265	265	214	217	169	175	299	308	200	200	139	139
98	Ruia	169	179	123	125	193	195	113	127	202	202	136	143	260	260	214	214	175	178	310	314	197	206	147	147
99	Ruia	159	165	105	125	195	203	115	125	202	202	136	143	262	262	214	217	175	175	299	305	200	206	139	139
100	Ruia	169	175	111	133	193	193	125	125	202	202	132	136	260	262	214	214	169	175	312	320	197	200	139	139
3	Solomon	175	177	105	125	197	207	123	125	202	205	134	150	262	265	214	214	169	172	299	303	200	200	139	147
2	Solomon	161	169	121	123	193	197	119	125	202	202	136	136	260	260	217	217	169	181	310	310	197	200	139	139
44	Solomon	165	169	127	137	193	193	115	129	205	205	134	134	261	262	214	217	169	169	299	308	197	200	139	139
41	Solomon	163	165	121	133	199	201	121	125	202	202	134	134	260	265	214	217	169	175	299	308	197	200	133	139
14	Solomon	163	171	123	139	193	201	113	123	202	208	134	136	265	265	214	217	169	175	299	310	200	200	133	139
15	Solomon	169	179	115	139	187	199	125	125	202	202	134	134	261	261	214	217	167	169	299	310	197	200	139	139
5	Solomon	173	175	123	123	193	199	117	125	202	202	134	143	260	260	214	217	167	169	303	327	197	209	136	139
7	Solomon	167	171	113	121	193	199	113	125	202	202	132	136	262	265	214	217	169	175	310	310	200	200	139	139
4	Solomon	169	179	121	139	193	205	115	127	202	202	134	143	260	260	214	214	167	169	299	299	197	206	139	147
11	Solomon	169	173	123	125	193	193	119	123	202	205	134	136	262	262	214	214	169	175	299	299	200	200	139	147
10	Solomon	169	169	121	123	193	193	105	123	202	205	134	134	262	262	214	214	169	175	308	310	200	200	139	139
6	Solomon	165	175	113	121	195	199	123	125	202	202	132	132	264	265	214	214	167	175	299	299	200	200	139	139
26	Solomon	171	179	113	117	193	205	115	123	202	202	132	152	260	260	217	220	175	175	308	310	197	197	139	139
46	Solomon	169	169	119	125	197	197	125	125	202	202	132	136	265	265	214	217	175	181	299	310	197	206	139	139
19	Solomon	169	173	105	125	193	201	123	125	202	205	132	134	262	265	217	217	167	175	299	308	200	200	139	139
21	Solomon	163	171	113	117	197	205	121	125	193	202	134	136	260	261	214	217	175	175	299	299	197	200	139	147
23	Solomon	169	169	115	121	199	201	123	127	202	202	134	134	260	261	214	214	169	175	299	299	194	200	133	139
38	Solomon	165	179	123	135	193	207	115	125	202	205	132	134	261	262	214	217	169	175	299	299	197	206	139	139
36	Solomon	173	175	125	125	197	209	125	127	202	202	134	147	262	265	214	214	169	169	310	316	197	197	139	139
42	Solomon	169	173	129	135	195	203	117	127	202	202	132	134	260	261	214	217	167	169	310	310	197	200	139	147
28	Solomon	171	179	113	125	193	199	125	125	202	202	141	143	261	262	214	214	167	175	299	299	197	200	139	139
32	Solomon	167	169	121	133	197	197	123	129	202	205	136	136	262	262	214	214	167	175	303	308	194	200	139	139
34	Solomon	0	0	125	137	0	0	0	0	202	202	134	141	260	262	217	217	169	175	0	0	200	200	139	147
43	Solomon	161	165	123	123	197	205	123	131	196	202	134	141	262	265	214	217	169	175	308	318	197	206	139	139
22	Solomon	157	171	113	139	193	199	113	125	202	202	134	134	261	262	214	217	169	172	299	299	197	200	139	139
48	Solomon	169	175	123	141	207	211	125	125	202	205	132	134	262	265	214	217	167	175	299	308	197	206	139	139
25	Solomon	165	171	123	125	193	195	125	125	196	202	134	136	262	262	214	214	169	169	314	316	197	200	139	139
49	Solomon	171	179	121	123	193	195	125	125	196	202	128	134	261	265	214	217	169	175	299	316	200	200	139	139
8	Solomon	163	173	121	139	195	207	123	125	202	202	136	143	260	262	214	214	169	175	299	299	200	206	139	139
33	Solomon	171	173	133	137	209	209	115	123	202	205	134	136	261	262	214	214	167	167	0	0	197	200	139	139
18	Solomon	161	165	121	125	193	201	123	125	202	205	134	134	262	262	214	217	167	169	299	312	197	200	139	139
12	Solomon	165	169	123	127	193	213	109	115	202	205	132	134	262	262	217	217	175	175	299	301	197	200	139	139
29	Solomon	171	177	121	125	197	201	115	115	196	202	132	141	261	262	217	217	167	175	299	301	200	209	139	139
1	Solomon	171	171	121	125	193	207	117	125	202	202	132	143	261	262	214	217	169	169	299	310	197	200	139	139
27	Solomon	171	175	121	133	193	197	121	125	202	202	134	134	260	262	214	214	169	169	299	299	200	206	136	147
13	Solomon	169	171	123	139	193	209	115	115	202	202	141	141	262	262	214	217	169	175	299	314	197	200	139	139
93	Lempes	163	179	105	125	195	197	121	123	202	205	134	134	260	265	214	214	169	175	303	308	197	200	133	139
94	Lempes	165	165	123	125	193	197	113	123	202	202	134	143	262	262	214	217	169	175	299	308	200	200	133	139
95	Lempes	163	169	123	133	197	199	105	123	202	202	132	143	262	265	214	217	172	172	299	299	194	206	139	147
96	Lempes	163	173	123	141	191	197	123	141	202	202	132	136	260	262	217	217	169	175	0	0	197	200	133	136
97	Lempes	163	169	121	123	193	197	123	123	202	202	132	134	262	262	217	217	169	175	299	299	0	0	147	147
98	Lempes	161	171	125	125	205	205	115	123	202	202	132	138	261	264	214	217	169	175	299	308	200	209	139	139
99	Lempes	171	173	105	123	193	193	123	125	202	202	132	143	260	262	214	217	169	175	299	308	194	200	139	139
100	Lempes	169	173	121	121	195	197	123	127	202	202	132	134	260	265	214	217	169	169	299	299	200	200	136	139
97	Tampa	163	165	123	137	193	199	115	115	202	205	132	134	262	262	214	217	167	169	299	299	197	200	147	147
98	Tampa	171	175	113	135	195	205	125	125	202	202	128	136	260	262	214	214	169	175	303	308	197	206	139	139
99	Tampa	165	171	125	135	187	193	115	125	202	208	134	134	260	264	214	214	169	169	299	310	200	200	139	139
100	Tampa	163	169	129	139	205	205	123	125	202	205	132	134	260	262	217	217	175	175	299	308	197	206	139	139
33	Lupului	169	171	121	121	193	197	115	131	202	202	132	134	260	264	214	217	169	169	297	299	197	197	139	139
34	Lupului	169	179	123	135	191	199	115	127	202	202	134	136	260	265	214	217	167	175	299	299	200	200	139	147
35	Lupului	169	175	123	123	193	193	125	125	202	205	143	147	262	262	217	217	175	175	299	299	200	209	147	147
36	Lupului	163	169	121	133	187	207	113	125	202	202	136	143	260	260	214	217	169	175	299	310	200	200	139	139
37	Lupului	163	179	113	121	205	205	125	125	202	202	134	134	260	262	214	217	169	175	299	320	197	197	139	139
38	Lupului	157	171	105	121	199	205	113	125	196	202	132	152	262	262	214	217	169	175	297	299	197	197	139	139
39	Lupului	163	171	121	139	193	209	119	125	202	205	134	134	260	260	214	217	167	169	299	314	200	209	139	139
40	Lupului	175	179	121	123	193	205	115	125	202	202	132	141	260	262	214	214	169	175	299	299	197	206	139	139
41	Lupului	171	171	121	127	193	197	123	125	202	202	134	134	260	260	217	217	169	175	299	308	200	206	139	139
42	Lupului	163	169	115	139	193	205	125	125	202	208	132	134	260	262	214	214	169	175	295	299	197	197	139	139
43	Lupului	169	179	125	139	187	193	125	131	202	205	134	136	260	260	214	220	169	169	299	308	200	206	139	139
44	Lupului	169	173	121	121	197	205	107	125	202	202	132	134	260	260	217	217	167	169	299	299	200	200	139	139
45	Lupului	165	169	105	125	187	195	125	125	202	202	136	143	260	264	214	217	169	175	299	314	206	209	139	139
46	Lupului	165	171	121	121	195	197	115	123	205	205	134	136	260	262	214	214	169	175	299	299	197	200	139	147
47	Lupului	165	175	105	117	195	207	115	125	202	202	134	136	260	262	217	217	175	175	303	310	206	206	139	147
48	Lupului	171	175	121	123	187	197	115	125	202	202	134	134	262	265	214	214	167	175	299	314	200	200	139	147
49	Lupului	161	163	105	121	199	207	117	125	202	205	134	136	260	262	214	214	175	175	312	314	197	197	139	147
50	Lupului	169	175	105	129	193	197	115	127	202	202	134	134	262	265	214	220	169	175	299	299	200	200	139	139
51	Lupului	175	179	105	121	193	193	125	131	202	202	132	132	260	262	214	214	169	172	308	314	197	206	139	147
52	Lupului	171	179	113	125	193	197	115	121	202	205	134	134	260	262	214	214	175	175	299	310	200	206	139	139
53	Lupului	169	173	121	139	195	195	125	125	202	202	136	152	260	262	214	217	169	175	299	308	197	200	139	139
54	Lupului	163	175	125	133	207	207	117	125	202	202	134	134	260	262	214	217	169	175	299	310	206	209	139	139
55	Lupului	163	169	129	135	187	199	115	127	202	202	134	143	262	264	214	217	175	175	299	320	197	209	139	147
56	Lupului	169	173	123	139	205	207	125	127	202	202	143	143	260	262	214	214	167	169	299	310	197	200	139	139
57	Lupului	169	171	123	125	193	205	113	125	202	202	132	134	262	262	214	217	169	175	297	299	200	200	139	139
58	Lupului	161	165	107	121	193	193	123	125	202	205	132	134	260	260	214	217	169	169	305	308	200	209	139	147
59	Lupului	171	179	107	113	193	197	125	125	205	205	132	134	260	260	214	214	169	175	299	310	200	200	139	147
60	Lupului	163	169	121	121	193	205	123	123	196	202	143	143	260	262	214	214	169	169	299	305	197	200	139	139
61	Lupului	169	169	121	123	199	207	123	127	202	202	136	141	260	262	214	217	175	175	299	310	197	197	139	139
62	Lupului	163	179	121	139	199	205	121	127	202	202	136	136	260	260	214	214	167	175	310	312	197	200	139	139
63	Lupului	169	179	123	141	193	199	123	125	202	202	134	141	260	262	214	217	169	175	299	305	200	200	139	139
64	Lupului	163	175	121	121	193	199	125	131	202	202	134	136	262	265	214	220	169	181	299	308	197	200	136	139
65	Lupului	169	179	107	125	201	205	123	123	202	202	134	134	262	262	214	214	167	175	299	310	197	197	139	139
66	Lupului	171	177	105	121	193	201	125	125	202	202	136	143	261	262	214	217	175	175	308	312	197	200	139	147
67	Lupului	169	171	123	123	201	205	113	125	202	202	132	134	262	262	214	214	169	175	299	310	197	200	139	139
68	Lupului	151	179	115	135	193	207	125	127	202	202	132	134	262	262	214	214	169	175	299	299	197	200	139	139
69	Lupului	163	169	119	119	195	207	113	125	202	202	134	134	262	265	214	217	167	169	320	323	197	200	139	139
70	Lupului	169	169	133	139	199	205	121	129	205	205	134	136	262	265	214	217	169	175	305	310	197	197	139	147
71	Lupului	157	175	113	123	193	197	123	125	202	202	134	136	262	265	214	214	172	175	299	299	194	209	136	139
72	Lupului	163	171	123	147	193	193	125	125	202	202	143	143	262	265	214	214	175	178	310	314	197	197	139	147
73	Lupului	171	173	125	150	193	195	115	125	202	202	134	134	260	262	214	214	169	175	299	310	206	206	139	147
74	Lupului	165	169	121	125	193	205	123	125	202	202	134	134	260	260	214	217	175	175	310	310	200	206	139	147
75	Lupului	169	171	121	123	197	199	119	125	196	202	134	136	262	262	214	214	167	175	299	318	197	197	139	147
76	Lupului	169	169	123	139	193	207	125	125	202	205	132	134	260	262	214	217	169	175	295	299	200	206	139	139
77	Lupului	169	169	123	123	193	205	123	127	202	202	134	136	262	265	214	217	175	175	299	314	200	200	139	147
78	Lupului	165	175	105	123	197	201	125	129	202	202	134	143	260	265	214	217	175	175	299	310	197	200	139	147
79	Lupului	171	173	123	139	193	207	123	127	202	202	134	138	262	262	214	217	169	169	299	308	200	200	139	139
80	Lupului	161	171	123	125	195	197	125	127	202	202	132	143	262	262	214	217	169	175	299	308	200	209	139	139
81	Lupului	161	171	123	135	193	195	121	127	202	205	132	134	260	262	214	214	169	175	299	299	200	200	139	139
82	Lupului	167	171	105	123	193	195	125	125	202	202	132	134	260	262	214	217	169	169	299	308	197	200	139	139
83	Lupului	161	169	121	121	193	193	125	125	202	202	141	143	260	261	217	217	175	175	299	303	200	200	139	139
84	Lupului	161	171	119	121	193	207	105	131	202	202	134	134	261	262	214	217	169	175	299	299	197	209	136	147
85	Lupului	159	169	127	133	191	207	115	115	202	202	134	134	260	260	214	214	175	175	299	299	197	200	139	139
86	Lupului	163	179	121	139	193	205	123	125	202	202	132	134	261	265	214	214	167	172	299	320	197	200	139	147
87	Lupului	171	173	123	131	197	207	123	125	202	202	134	136	265	265	214	214	169	169	299	314	197	197	139	147
88	Lupului	163	163	131	139	193	205	121	123	202	202	132	134	260	261	214	217	169	175	299	310	197	200	139	139
89	Lupului	165	179	105	123	195	205	125	129	202	202	134	134	260	265	214	217	175	175	310	320	200	200	139	147
90	Lupului	169	175	121	125	195	209	121	127	202	202	132	136	260	265	214	220	169	175	299	305	200	200	147	147
91	Lupului	161	177	121	123	193	205	125	127	202	202	132	134	260	265	214	214	169	175	299	308	200	200	139	139
92	Lupului	165	169	125	127	193	195	115	125	202	205	134	136	260	265	214	217	169	175	299	299	197	197	139	147
93	Lupului	165	179	121	121	193	205	123	125	202	202	132	134	260	260	214	214	169	175	299	305	197	200	139	139
94	Lupului	151	169	125	125	193	207	125	125	202	202	128	132	260	265	214	214	169	175	299	299	197	197	139	147
95	Lupului	171	179	121	123	193	195	123	125	202	205	134	134	260	262	214	217	169	169	299	305	200	200	139	139
96	Lupului	169	171	125	135	195	209	119	123	202	205	134	134	260	260	214	214	169	169	305	305	197	197	147	147
97	Lupului	163	175	121	121	193	193	123	127	202	202	132	143	260	262	214	214	169	169	299	299	197	200	139	139
98	Lupului	157	163	125	135	193	205	115	123	202	202	132	132	262	265	214	214	169	175	299	303	197	206	139	139
99	Lupului	171	179	121	125	205	205	125	127	202	202	134	136	260	260	214	217	167	175	305	316	200	206	139	147
100	Lupului	165	175	121	139	197	207	125	127	202	202	132	132	262	262	217	217	167	175	305	310	206	206	136	139
1	Lempes	169	169	127	139	197	203	113	123	202	202	132	143	262	262	214	217	167	169	299	310	194	200	139	147
2	Lempes	161	169	125	125	195	201	113	123	199	202	132	141	261	265	214	217	169	175	299	310	200	200	133	136
3	Lempes	161	171	123	123	197	197	123	125	205	208	132	132	260	262	217	217	167	169	299	308	197	200	139	139
4	Lempes	165	173	109	113	197	205	123	127	202	202	134	134	262	262	214	214	167	169	299	308	197	209	139	139
5	Lempes	169	173	123	139	195	205	113	123	202	202	134	134	260	260	217	217	169	172	299	310	200	200	139	147
96	Tampa	169	171	121	125	193	209	125	127	202	202	134	136	262	262	217	220	169	175	299	312	200	206	139	139
53	Solomon	161	163	123	139	193	197	125	131	202	202	134	134	260	262	217	217	169	169	295	333	200	200	139	139
6	Lempes	163	171	115	125	197	197	121	123	196	202	136	136	261	265	214	217	169	172	308	310	197	209	139	139
7	Lempes	169	175	125	139	195	197	127	127	202	202	132	132	262	265	214	214	169	169	297	299	200	206	139	139
8	Lempes	173	173	115	129	197	197	123	127	202	202	134	141	262	262	217	217	167	175	299	308	200	209	139	139
9	Lempes	173	173	123	129	193	195	115	125	202	208	134	134	260	262	217	217	169	175	299	308	200	200	139	147
10	Lempes	169	169	139	139	195	215	123	127	202	202	134	147	260	262	214	214	169	169	297	316	197	200	139	139
11	Lempes	169	169	121	123	195	197	115	123	202	202	134	143	260	262	217	217	169	172	308	310	197	200	139	147
12	Lempes	169	173	113	139	195	205	113	129	202	208	132	134	260	262	214	217	167	169	299	310	200	200	136	147
13	Lempes	163	173	123	125	195	197	123	125	202	205	134	141	260	262	214	214	169	172	299	308	197	200	133	139
14	Lempes	157	171	121	125	193	197	123	125	202	205	132	132	260	260	214	214	169	169	299	316	200	200	139	147
15	Lempes	169	169	125	139	193	195	115	123	202	202	134	134	262	262	214	217	169	172	303	314	197	197	133	139
16	Lempes	163	169	115	129	197	197	121	123	202	202	134	143	262	262	214	214	169	175	299	299	197	200	136	139
17	Lempes	163	179	123	125	193	197	123	125	202	202	134	134	262	262	214	217	169	172	299	308	197	206	139	147
18	Lempes	165	173	105	125	197	201	123	127	202	202	134	134	260	262	214	217	169	172	299	308	197	206	139	139
19	Lempes	161	169	107	113	199	207	100	100	196	202	132	143	260	262	214	217	169	175	299	299	194	197	139	139
20	Lempes	165	169	121	125	195	205	113	131	202	202	132	134	260	262	214	217	169	172	299	310	200	209	139	139
21	Lempes	169	177	125	125	195	195	123	123	202	202	132	134	261	262	217	217	169	175	299	299	197	200	139	139
22	Lempes	169	171	123	133	205	205	121	125	202	202	130	132	260	262	217	217	169	169	299	308	0	0	139	147
23	Lempes	165	173	117	129	193	195	121	123	196	202	134	143	261	262	214	217	169	175	299	299	200	209	139	139
24	Lempes	169	171	121	121	197	207	123	123	202	205	128	136	261	262	214	217	169	175	308	316	197	197	139	139
25	Lempes	165	171	139	145	195	201	123	131	202	202	136	143	260	261	214	214	169	169	299	299	200	200	136	139
26	Lempes	159	171	121	121	193	193	125	125	202	205	132	134	260	265	214	217	169	169	310	312	200	206	139	147
27	Lempes	163	163	121	133	193	205	123	123	202	205	132	132	260	262	214	217	167	169	299	305	200	206	133	147
28	Lempes	161	169	123	127	205	207	123	123	202	202	134	134	260	265	214	217	169	175	299	314	197	209	136	139
29	Lempes	171	173	125	139	193	195	125	131	202	202	134	143	262	262	214	217	172	175	299	308	197	200	139	139
30	Lempes	171	171	121	135	193	193	115	123	202	202	145	147	262	265	214	217	169	169	310	314	197	209	139	139
31	Lempes	163	163	121	125	197	197	123	123	202	202	132	134	260	262	214	214	167	175	299	299	197	197	133	139
32	Lempes	161	163	123	125	195	199	123	125	202	202	128	134	260	262	214	217	169	169	299	299	200	200	139	147
33	Lempes	169	177	129	139	195	197	119	123	202	202	132	134	261	262	214	217	169	175	299	299	200	200	136	139
34	Lempes	179	179	113	125	205	205	123	131	202	202	134	143	260	265	214	214	169	175	305	314	197	200	139	139
35	Lempes	165	169	121	127	201	205	123	125	202	202	132	136	262	262	214	217	169	175	299	299	200	209	147	147
36	Lempes	161	163	123	125	197	205	121	121	202	202	132	134	262	265	214	217	172	175	299	299	197	200	139	147
37	Lempes	169	173	123	129	193	195	115	123	202	202	134	147	260	262	209	214	169	169	299	310	200	206	133	139
38	Lempes	169	169	117	139	197	205	123	125	202	202	134	134	260	262	214	217	169	172	299	301	200	200	139	147
39	Lempes	171	173	113	135	193	197	125	125	202	202	134	134	262	262	214	217	169	175	299	299	197	200	139	147
40	Lempes	159	169	125	125	195	205	107	123	202	205	132	136	262	262	214	214	169	175	299	310	197	200	139	139
41	Lempes	165	165	121	125	197	205	121	125	205	208	134	145	262	262	214	217	172	175	299	301	200	200	139	147
42	Lempes	173	179	111	125	195	195	125	125	202	205	134	145	262	264	214	217	167	167	299	308	200	206	139	147
43	Lempes	169	171	117	135	193	201	123	125	202	202	134	136	260	262	214	217	169	175	299	299	200	206	139	139
44	Lempes	173	177	105	125	193	195	113	123	202	202	132	132	260	262	214	217	169	172	299	312	200	209	139	147
45	Lempes	175	177	125	125	195	197	125	125	202	208	132	145	260	262	214	217	169	172	297	299	197	200	139	147
46	Lempes	169	169	113	123	193	201	117	125	202	208	132	134	261	262	214	217	169	181	299	299	197	200	139	139
47	Lempes	163	169	123	123	197	199	127	127	202	202	134	138	262	262	214	217	175	178	299	299	200	206	139	139
48	Lempes	161	171	121	123	205	205	115	115	202	202	132	134	265	265	214	214	167	169	299	299	200	206	147	147
49	Lempes	169	173	113	123	195	201	113	125	205	205	134	141	261	265	214	217	169	176	299	312	206	206	139	139
50	Lempes	171	171	123	125	197	207	105	125	202	202	134	134	261	262	214	214	167	175	308	310	197	197	133	139

## Sheet: coordinates
sample_number	population	sampleID	longitude	latitude
1	Lempes	SiB1	25.6469	45.728
10	Lempes	SiB10	25.6517	45.7265
100	Lempes	SiB100	25.651	45.7249
11	Lempes	SiB11	25.6519	45.7266
12	Lempes	SiB12	25.6525	45.7262
13	Lempes	SiB13	25.6521	45.726
14	Lempes	SiB14	25.6525	45.7258
15	Lempes	SiB15	25.6521	45.7256
16	Lempes	SiB16	25.6523	45.7256
17	Lempes	SiB17	25.6525	45.7256
18	Lempes	SiB18	25.6532	45.7258
19	Lempes	SiB19	25.6536	45.7262
2	Lempes	SiB2	25.645	45.7277
20	Lempes	SiB20	25.6527	45.7264
21	Lempes	SiB21	25.6529	45.7266
22	Lempes	SiB22	25.653	45.7268
23	Lempes	SiB23	25.6535	45.7264
24	Lempes	SiB24	25.6534	45.7263
25	Lempes	SiB25	25.6531	45.7265
26	Lempes	SiB26	25.6529	45.726
27	Lempes	SiB27	25.6531	45.7258
28	Lempes	SiB28	25.6531	45.7255
29	Lempes	SiB29	25.6527	45.7254
3	Lempes	SiB3	25.6452	45.7269
30	Lempes	SiB30	25.6529	45.7253
31	Lempes	SiB31	25.653	45.7252
32	Lempes	SiB32	25.6533	45.7258
33	Lempes	SiB33	25.6538	45.7259
34	Lempes	SiB34	25.6537	45.7261
35	Lempes	SiB35	25.654	45.7265
36	Lempes	SiB36	25.6543	45.7265
37	Lempes	SiB37	25.6545	45.727
38	Lempes	SiB38	25.6544	45.7269
39	Lempes	SiB39	25.6553	45.727
4	Lempes	SiB4	25.6466	45.727
40	Lempes	SiB40	25.6553	45.7265
41	Lempes	SiB41	25.6551	45.7265
42	Lempes	SiB42	25.6557	45.7266
43	Lempes	SiB43	25.6559	45.7269
44	Lempes	SiB44	25.6566	45.727
45	Lempes	SiB45	25.657	45.7272
46	Lempes	SiB46	25.6582	45.7268
47	Lempes	SiB47	25.6589	45.727
48	Lempes	SiB48	25.6597	45.7276
49	Lempes	SiB49	25.6597	45.7273
5	Lempes	SiB5	25.6469	45.7272
50	Lempes	SiB50	25.6599	45.727
51	Lempes	SiB51	25.6602	45.7273
52	Lempes	SiB52	25.6606	45.7272
53	Lempes	SiB53	25.6603	45.728
54	Lempes	SiB54	25.6622	45.7263
55	Lempes	SiB55	25.6624	45.7258
56	Lempes	SiB56	25.6626	45.7259
57	Lempes	SiB57	25.6633	45.7257
58	Lempes	SiB58	25.6631	45.7255
59	Lempes	SiB59	25.6632	45.7251
6	Lempes	SiB6	25.6478	45.7272
60	Lempes	SiB60	25.6629	45.7246
61	Lempes	SiB61	25.6623	45.7257
62	Lempes	SiB62	25.6624	45.7256
63	Lempes	SiB63	25.6621	45.7256
64	Lempes	SiB64	25.6618	45.7256
65	Lempes	SiB65	25.6605	45.726
66	Lempes	SiB66	25.6597	45.7263
67	Lempes	SiB67	25.6599	45.7261
68	Lempes	SiB68	25.6595	45.7264
69	Lempes	SiB69	25.6586	45.7264
7	Lempes	SiB7	25.6487	45.7265
70	Lempes	SiB70	25.6585	45.7265
71	Lempes	SiB71	25.6584	45.7263
72	Lempes	SiB72	25.6581	45.7262
73	Lempes	SiB73	25.658	45.7264
74	Lempes	SiB74	25.6579	45.7263
75	Lempes	SiB75	25.6576	45.7264
76	Lempes	SiB76	25.6578	45.7263
77	Lempes	SiB77	25.6581	45.7267
78	Lempes	SiB78	25.6565	45.7262
79	Lempes	SiB79	25.6559	45.7264
8	Lempes	SiB8	25.6497	45.7271
80	Lempes	SiB80	25.6555	45.7263
81	Lempes	SiB81	25.6553	45.7261
82	Lempes	SiB82	25.6555	45.7267
83	Lempes	SiB83	25.6549	45.7269
84	Lempes	SiB84	25.6546	45.7264
85	Lempes	SiB85	25.6545	45.7261
86	Lempes	SiB86	25.6543	45.7257
87	Lempes	SiB87	25.6543	45.7255
88	Lempes	SiB88	25.6541	45.7259
89	Lempes	SiB89	25.654	45.7258
9	Lempes	SiB9	25.6502	45.7264
90	Lempes	SiB90	25.6542	45.7256
91	Lempes	SiB91	25.6548	45.7262
92	Lempes	SiB92	25.6527	45.7253
93	Lempes	SiB93	25.6526	45.7253
94	Lempes	SiB94	25.6522	45.7252
95	Lempes	SiB95	25.6521	45.7247
96	Lempes	SiB96	25.652	45.7247
97	Lempes	SiB97	25.6521	45.7245
98	Lempes	SiB98	25.6518	45.7244
99	Lempes	SiB99	25.6513	45.7245
1	Lupului	LuB1	25.5444	45.5859
10	Lupului	LuB10	25.5448	45.5846
100	Lupului	LuB100	25.5435	45.585
11	Lupului	LuB11	25.5444	45.5846
12	Lupului	LuB12	25.5444	45.5843
13	Lupului	LuB13	25.5446	45.584
14	Lupului	LuB14	25.5449	45.5841
15	Lupului	LuB15	25.5454	45.584
16	Lupului	LuB16	25.5451	45.5834
17	Lupului	LuB17	25.5451	45.5835
18	Lupului	LuB18	25.5453	45.5833
19	Lupului	LuB19	25.5447	45.5831
2	Lupului	LuB2	25.5445	45.5856
20	Lupului	LuB20	25.5444	45.5836
21	Lupului	LuB21	25.5444	45.5834
22	Lupului	LuB22	25.5444	45.5832
23	Lupului	LuB23	25.5448	45.5827
24	Lupului	LuB24	25.5451	45.5822
25	Lupului	LuB25	25.5451	45.5829
26	Lupului	LuB26	25.5454	45.5825
27	Lupului	LuB27	25.5455	45.5824
28	Lupului	LuB28	25.5456	45.5823
29	Lupului	LuB29	25.5454	45.5818
3	Lupului	LuB3	25.5445	45.5854
30	Lupului	LuB30	25.5456	45.5823
31	Lupului	LuB31	25.5457	45.5821
32	Lupului	LuB32	25.5459	45.5822
33	Lupului	LuB33	25.5458	45.5823
34	Lupului	LuB34	25.5457	45.582
35	Lupului	LuB35	25.5453	45.5826
36	Lupului	LuB36	25.5454	45.5821
37	Lupului	LuB37	25.545	45.5819
38	Lupului	LuB38	25.5453	45.5824
39	Lupului	LuB39	25.5452	45.5819
4	Lupului	LuB4	25.5444	45.5851
40	Lupului	LuB40	25.5454	45.5816
41	Lupului	LuB41	25.5451	45.5816
42	Lupului	LuB42	25.5452	45.5816
43	Lupului	LuB43	25.5451	45.5812
44	Lupului	LuB44	25.5451	45.5811
45	Lupului	LuB45	25.5449	45.581
46	Lupului	LuB46	25.5449	45.5809
47	Lupului	LuB47	25.5448	45.5808
48	Lupului	LuB48	25.5452	45.5807
49	Lupului	LuB49	25.5449	45.5805
5	Lupului	LuB5	25.5448	45.5852
50	Lupului	LuB50	25.544	45.5803
51	Lupului	LuB51	25.5438	45.5805
52	Lupului	LuB52	25.5435	45.5805
53	Lupului	LuB53	25.5432	45.5806
54	Lupului	LuB54	25.5431	45.5805
55	Lupului	LuB55	25.5429	45.5807
56	Lupului	LuB56	25.5432	45.5808
57	Lupului	LuB57	25.5435	45.5809
58	Lupului	LuB58	25.5431	45.5808
59	Lupului	LuB59	25.5426	45.5813
6	Lupului	LuB6	25.545	45.5852
60	Lupului	LuB60	25.5423	45.5811
61	Lupului	LuB61	25.542	45.5812
62	Lupului	LuB62	25.542	45.581
63	Lupului	LuB63	25.5423	45.5807
64	Lupului	LuB64	25.543	45.5812
65	Lupului	LuB65	25.5433	45.5813
66	Lupului	LuB66	25.543	45.5818
67	Lupului	LuB67	25.5433	45.5821
68	Lupului	LuB68	25.5431	45.5823
69	Lupului	LuB69	25.5437	45.5822
7	Lupului	LuB7	25.5454	45.5849
70	Lupului	LuB70	25.5439	45.5826
71	Lupului	LuB71	25.5436	45.5826
72	Lupului	LuB72	25.5436	45.5827
73	Lupului	LuB73	25.5439	45.583
74	Lupului	LuB74	25.5436	45.5833
75	Lupului	LuB75	25.5435	45.5832
76	Lupului	LuB76	25.5436	45.5831
77	Lupului	LuB77	25.5434	45.5832
78	Lupului	LuB78	25.5434	45.5833
79	Lupului	LuB79	25.5431	45.5835
8	Lupului	LuB8	25.5451	45.5848
80	Lupului	LuB80	25.5433	45.5835
81	Lupului	LuB81	25.5434	45.5837
82	Lupului	LuB82	25.5435	45.5837
83	Lupului	LuB83	25.5437	45.5839
84	Lupului	LuB84	25.5437	45.5838
85	Lupului	LuB85	25.5434	45.584
86	Lupului	LuB86	25.5433	45.5842
87	Lupului	LuB87	25.5433	45.5841
88	Lupului	LuB88	25.5436	45.5841
89	Lupului	LuB89	25.5437	45.5842
9	Lupului	LuB9	25.545	45.5848
90	Lupului	LuB90	25.5439	45.5844
91	Lupului	LuB91	25.5433	45.5844
92	Lupului	LuB92	25.5431	45.5843
93	Lupului	LuB93	25.5429	45.5843
94	Lupului	LuB94	25.5429	45.5842
95	Lupului	LuB95	25.5425	45.584
96	Lupului	LuB96	25.5425	45.5842
97	Lupului	LuB97	25.5433	45.5843
98	Lupului	LuB98	25.543	45.5848
99	Lupului	LuB99	25.5432	45.5849
1	Ruia	RuB1	25.5576	45.5786
10	Ruia	RuB10	25.5544	45.5745
100	Ruia	RuB100	25.5487	45.5775
11	Ruia	RuB11	25.554	45.573
12	Ruia	RuB12	25.554	45.5755
13	Ruia	RuB13	25.5542	45.5755
14	Ruia	RuB14	25.5542	45.5761
15	Ruia	RuB15	25.5543	45.5764
16	Ruia	RuB16	25.5552	45.5761
17	Ruia	RuB17	25.5554	45.5761
18	Ruia	RuB18	25.5556	45.5748
19	Ruia	RuB19	25.5556	45.5765
2	Ruia	RuB2	25.5572	45.5786
20	Ruia	RuB20	25.556	45.5766
21	Ruia	RuB21	25.5538	45.5767
22	Ruia	RuB22	25.5537	45.5762
23	Ruia	RuB23	25.5535	45.5764
24	Ruia	RuB24	25.5536	45.5762
25	Ruia	RuB25	25.5534	45.5765
26	Ruia	RuB26	25.5536	45.5768
27	Ruia	RuB27	25.5533	45.5769
28	Ruia	RuB28	25.5532	45.5771
29	Ruia	RuB29	25.5535	45.5767
3	Ruia	RuB3	25.5567	45.5787
30	Ruia	RuB30	25.553	45.5767
31	Ruia	RuB31	25.559	45.5805
32	Ruia	RuB32	25.5592	45.5806
33	Ruia	RuB33	25.5592	45.5804
34	Ruia	RuB34	25.559	45.5801
35	Ruia	RuB35	25.5596	45.5801
36	Ruia	RuB36	25.5598	45.5798
37	Ruia	RuB37	25.5595	45.5798
38	Ruia	RuB38	25.56	45.5796
39	Ruia	RuB39	25.5602	45.5799
4	Ruia	RuB4	25.5562	45.5789
40	Ruia	RuB40	25.5598	45.5802
41	Ruia	RuB41	25.5599	45.5801
42	Ruia	RuB42	25.5598	45.5804
43	Ruia	RuB43	25.5599	45.5807
44	Ruia	RuB44	25.5601	45.5809
45	Ruia	RuB45	25.5598	45.581
46	Ruia	RuB46	25.5604	45.5809
47	Ruia	RuB47	25.5606	45.5808
48	Ruia	RuB48	25.5607	45.5804
49	Ruia	RuB49	25.5606	45.5806
5	Ruia	RuB5	25.5567	45.5773
50	Ruia	RuB50	25.561	45.5808
51	Ruia	RuB51	25.5609	45.5809
52	Ruia	RuB52	25.5605	45.581
53	Ruia	RuB53	25.5616	45.5806
54	Ruia	RuB54	25.5609	45.5804
55	Ruia	RuB55	25.5611	45.5802
56	Ruia	RuB56	25.5611	45.58
57	Ruia	RuB57	25.5609	45.5801
58	Ruia	RuB58	25.5608	45.5803
59	Ruia	RuB59	25.5605	45.5799
6	Ruia	RuB6	25.5571	45.5766
60	Ruia	RuB60	25.5602	45.5798
61	Ruia	RuB61	25.5595	45.5792
62	Ruia	RuB62	25.5593	45.5793
63	Ruia	RuB63	25.5589	45.579
64	Ruia	RuB64	25.5588	45.5791
65	Ruia	RuB65	25.5588	45.5784
66	Ruia	RuB66	25.5514	45.576
67	Ruia	RuB67	25.5512	45.576
68	Ruia	RuB68	25.5511	45.5759
69	Ruia	RuB69	25.5508	45.5762
7	Ruia	RuB7	25.5568	45.5762
70	Ruia	RuB70	25.5507	45.5758
71	Ruia	RuB71	25.5507	45.5757
72	Ruia	RuB72	25.5509	45.5756
73	Ruia	RuB73	25.5512	45.5756
74	Ruia	RuB74	25.5513	45.5755
75	Ruia	RuB75	25.5513	45.5755
76	Ruia	RuB76	25.5511	45.5755
77	Ruia	RuB77	25.551	45.5754
78	Ruia	RuB78	25.5514	45.5752
79	Ruia	RuB79	25.5513	45.5751
8	Ruia	RuB8	25.5551	45.5749
80	Ruia	RuB80	25.552	45.5747
81	Ruia	RuB81	25.5521	45.5752
82	Ruia	RuB82	25.5511	45.5762
83	Ruia	RuB83	25.5511	45.5765
84	Ruia	RuB84	25.5508	45.5766
85	Ruia	RuB85	25.5509	45.5765
86	Ruia	RuB86	25.5505	45.5768
87	Ruia	RuB87	25.5504	45.5766
88	Ruia	RuB88	25.5503	45.577
89	Ruia	RuB89	25.5501	45.5768
9	Ruia	RuB9	25.555	45.575
90	Ruia	RuB90	25.5495	45.5766
91	Ruia	RuB91	25.5493	45.5766
92	Ruia	RuB92	25.5488	45.577
93	Ruia	RuB93	25.5486	45.5772
94	Ruia	RuB94	25.5498	45.5775
95	Ruia	RuB95	25.5497	45.5774
96	Ruia	RuB96	25.5494	45.5775
97	Ruia	RuB97	25.5492	45.5777
98	Ruia	RuB98	25.5495	45.5775
99	Ruia	RuB99	25.5488	45.5777
1	Solomon	SoB1	25.56	45.6171
10	Solomon	SoB10	25.5608	45.6169
100	Solomon	SoB100	25.5603	45.6156
11	Solomon	SoB11	25.5608	45.6168
12	Solomon	SoB12	25.5611	45.6169
13	Solomon	SoB13	25.5614	45.6165
14	Solomon	SoB14	25.5611	45.6162
15	Solomon	SoB15	25.5616	45.6162
16	Solomon	SoB16	25.5618	45.6164
17	Solomon	SoB17	25.5615	45.6163
18	Solomon	SoB18	25.5617	45.6162
19	Solomon	SoB19	25.5618	45.6161
2	Solomon	SoB2	25.5601	45.6171
20	Solomon	SoB20	25.5623	45.616
21	Solomon	SoB21	25.562	45.6158
22	Solomon	SoB22	25.5615	45.616
23	Solomon	SoB23	25.5612	45.6163
24	Solomon	SoB24	25.5608	45.6163
25	Solomon	SoB25	25.5609	45.6162
26	Solomon	SoB26	25.5607	45.6163
27	Solomon	SoB27	25.5607	45.6164
28	Solomon	SoB28	25.5608	45.6166
29	Solomon	SoB29	25.5605	45.6167
3	Solomon	SoB3	25.5598	45.6172
30	Solomon	SoB30	25.5602	45.6167
31	Solomon	SoB31	25.5604	45.6166
32	Solomon	SoB32	25.5604	45.6167
33	Solomon	SoB33	25.5604	45.6169
34	Solomon	SoB34	25.5603	45.617
35	Solomon	SoB35	25.5602	45.6169
36	Solomon	SoB36	25.56	45.6168
37	Solomon	SoB37	25.5596	45.6169
38	Solomon	SoB38	25.5601	45.6167
39	Solomon	SoB39	25.5599	45.6168
4	Solomon	SoB4	25.5601	45.6171
40	Solomon	SoB40	25.5597	45.6167
41	Solomon	SoB41	25.5601	45.6168
42	Solomon	SoB42	25.56	45.6165
43	Solomon	SoB43	25.5603	45.6164
44	Solomon	SoB44	25.56	45.6166
45	Solomon	SoB45	25.5602	45.6164
46	Solomon	SoB46	25.5604	45.6165
47	Solomon	SoB47	25.5604	45.6165
48	Solomon	SoB48	25.5607	45.6164
49	Solomon	SoB49	25.5604	45.6162
5	Solomon	SoB5	25.5601	45.617
50	Solomon	SoB50	25.5606	45.6162
51	Solomon	SoB51	25.5609	45.6161
52	Solomon	SoB52	25.5611	45.616
53	Solomon	SoB53	25.5601	45.6162
54	Solomon	SoB54	25.5609	45.616
55	Solomon	SoB55	25.5612	45.616
56	Solomon	SoB56	25.5615	45.6159
57	Solomon	SoB57	25.5611	45.6158
58	Solomon	SoB58	25.561	45.6159
59	Solomon	SoB59	25.5612	45.6157
6	Solomon	SoB6	25.5603	45.6171
60	Solomon	SoB60	25.5612	45.6158
61	Solomon	SoB61	25.5605	45.6159
62	Solomon	SoB62	25.5611	45.6156
63	Solomon	SoB63	25.5612	45.6155
64	Solomon	SoB64	25.5611	45.6154
65	Solomon	SoB65	25.5609	45.6151
66	Solomon	SoB66	25.5607	45.6151
67	Solomon	SoB67	25.561	45.6149
68	Solomon	SoB68	25.5615	45.6148
69	Solomon	SoB69	25.5613	45.6146
7	Solomon	SoB7	25.5602	45.6171
70	Solomon	SoB70	25.5604	45.6177
71	Solomon	SoB71	25.5604	45.6178
72	Solomon	SoB72	25.5602	45.6177
73	Solomon	SoB73	25.5604	45.6179
74	Solomon	SoB74	25.5605	45.618
75	Solomon	SoB75	25.5601	45.6182
76	Solomon	SoB76	25.5599	45.6179
77	Solomon	SoB77	25.5597	45.618
78	Solomon	SoB78	25.5598	45.6179
79	Solomon	SoB79	25.5602	45.6181
8	Solomon	SoB8	25.5604	45.617
80	Solomon	SoB80	25.5601	45.6175
81	Solomon	SoB81	25.5601	45.6173
82	Solomon	SoB82	25.5599	45.6174
83	Solomon	SoB83	25.5595	45.6175
84	Solomon	SoB84	25.5593	45.6175
85	Solomon	SoB85	25.5592	45.6174
86	Solomon	SoB86	25.5594	45.6178
87	Solomon	SoB87	25.5599	45.6172
88	Solomon	SoB88	25.5601	45.617
89	Solomon	SoB89	25.5598	45.6165
9	Solomon	SoB9	25.5606	45.6168
90	Solomon	SoB90	25.5597	45.6164
91	Solomon	SoB91	25.56	45.6164
92	Solomon	SoB92	25.5601	45.6164
93	Solomon	SoB93	25.56	45.6163
94	Solomon	SoB94	25.5598	45.6164
95	Solomon	SoB95	25.56	45.6162
96	Solomon	SoB96	25.56	45.616
97	Solomon	SoB97	25.5601	45.6159
98	Solomon	SoB98	25.5601	45.6158
99	Solomon	SoB99	25.5604	45.6158
1	Tampa	TaB1	25.6042	45.6414
10	Tampa	TaB10	25.5996	45.6407
100	Tampa	TaB100	25.5915	45.637
11	Tampa	TaB11	25.5993	45.6406
12	Tampa	TaB12	25.5995	45.6411
13	Tampa	TaB13	25.5994	45.641
14	Tampa	TaB14	25.5993	45.6408
15	Tampa	TaB15	25.5991	45.6409
16	Tampa	TaB16	25.5994	45.6409
17	Tampa	TaB17	25.5991	45.6408
18	Tampa	TaB18	25.5988	45.6403
19	Tampa	TaB19	25.5988	45.6406
2	Tampa	TaB2	25.604	45.6414
20	Tampa	TaB20	25.5988	45.6407
21	Tampa	TaB21	25.5983	45.6404
22	Tampa	TaB22	25.5985	45.64
23	Tampa	TaB23	25.5982	45.6405
24	Tampa	TaB24	25.598	45.6402
25	Tampa	TaB25	25.5978	45.6402
26	Tampa	TaB26	25.5984	45.6403
27	Tampa	TaB27	25.5981	45.64
28	Tampa	TaB28	25.5977	45.6401
29	Tampa	TaB29	25.5978	45.6401
3	Tampa	TaB3	25.6019	45.6416
30	Tampa	TaB30	25.5979	45.6401
31	Tampa	TaB31	25.5979	45.64
32	Tampa	TaB32	25.598	45.6398
33	Tampa	TaB33	25.5979	45.6399
34	Tampa	TaB34	25.5978	45.6398
35	Tampa	TaB35	25.5978	45.6399
36	Tampa	TaB36	25.5975	45.6396
37	Tampa	TaB37	25.5976	45.6397
38	Tampa	TaB38	25.5975	45.6401
39	Tampa	TaB39	25.5978	45.6398
4	Tampa	TaB4	25.601	45.6415
40	Tampa	TaB40	25.5973	45.6398
41	Tampa	TaB41	25.5972	45.6398
42	Tampa	TaB42	25.5971	45.6398
43	Tampa	TaB43	25.5969	45.6398
44	Tampa	TaB44	25.597	45.6397
45	Tampa	TaB45	25.5971	45.6397
46	Tampa	TaB46	25.5964	45.6396
47	Tampa	TaB47	25.5967	45.6395
48	Tampa	TaB48	25.5969	45.6396
49	Tampa	TaB49	25.5966	45.6395
5	Tampa	TaB5	25.5998	45.6415
50	Tampa	TaB50	25.5972	45.6395
51	Tampa	TaB51	25.5969	45.6392
52	Tampa	TaB52	25.5966	45.6398
53	Tampa	TaB53	25.5962	45.6397
54	Tampa	TaB54	25.5965	45.6399
55	Tampa	TaB55	25.5956	45.6397
56	Tampa	TaB56	25.5961	45.6396
57	Tampa	TaB57	25.5962	45.6395
58	Tampa	TaB58	25.5957	45.6395
59	Tampa	TaB59	25.5957	45.6396
6	Tampa	TaB6	25.6002	45.6413
60	Tampa	TaB60	25.5956	45.6391
61	Tampa	TaB61	25.5954	45.6393
62	Tampa	TaB62	25.5954	45.6392
63	Tampa	TaB63	25.5953	45.6389
64	Tampa	TaB64	25.5957	45.6391
65	Tampa	TaB65	25.5954	45.6386
66	Tampa	TaB66	25.595	45.639
67	Tampa	TaB67	25.5949	45.6389
68	Tampa	TaB68	25.5949	45.6388
69	Tampa	TaB69	25.5949	45.6387
7	Tampa	TaB7	25.6004	45.641
70	Tampa	TaB70	25.5947	45.6386
71	Tampa	TaB71	25.5947	45.6388
72	Tampa	TaB72	25.5944	45.6387
73	Tampa	TaB73	25.5942	45.6386
74	Tampa	TaB74	25.5942	45.6383
75	Tampa	TaB75	25.5943	45.6386
76	Tampa	TaB76	25.5943	45.6383
77	Tampa	TaB77	25.5945	45.6382
78	Tampa	TaB78	25.5946	45.6383
79	Tampa	TaB79	25.5942	45.6382
8	Tampa	TaB8	25.5999	45.6409
80	Tampa	TaB80	25.5941	45.6383
81	Tampa	TaB81	25.5937	45.6383
82	Tampa	TaB82	25.5935	45.6382
83	Tampa	TaB83	25.5936	45.6381
84	Tampa	TaB84	25.5935	45.6378
85	Tampa	TaB85	25.5935	45.6377
86	Tampa	TaB86	25.593	45.638
87	Tampa	TaB87	25.5929	45.6381
88	Tampa	TaB88	25.5928	45.6378
89	Tampa	TaB89	25.5925	45.6378
9	Tampa	TaB9	25.6001	45.6407
90	Tampa	TaB90	25.5929	45.6377
91	Tampa	TaB91	25.5925	45.6372
92	Tampa	TaB92	25.5923	45.6372
93	Tampa	TaB93	25.592	45.6373
94	Tampa	TaB94	25.5924	45.6371
95	Tampa	TaB95	25.5923	45.6372
96	Tampa	TaB96	25.592	45.637
97	Tampa	TaB97	25.5918	45.637
98	Tampa	TaB98	25.5916	45.6369
99	Tampa	TaB99	25.5918	45.6368
